# Supplementary material
Source: Research Square preprint supplement (doi:10.21203/rs.3.rs-9208968/v1)

***Integrative Multi-Omics Framework Reveals Microbial and Chemical Biomarkers for Diagnosing Copper Contamination in False Yellowhead–Colonized Soils*.**

Quentin Lemoine1,2,3, Mohamed Bouarfa4, Delphine Raviglione1,5, Eve Toulza6, Bruno Charriere2, Manuel Henry2, Christophe Menniti2, Cédric Bertrand1,4, Dominique Aubert2, Christophe Calvayrac3,†, Marie-Virginie Salvia1,†

1PSL Université Paris: EPHE-UPVD-CNRS, UAR 3278 CRIOBE, Université de Perpignan Via Domitia, 52 Avenue Paul Alduy, 66860 Perpignan Cedex, France

2Cefrem CNRS-UMR5110, Université de Perpignan Via Domitia, 52 Avenue Paul Alduy, 66860 Perpignan Cedex, France

3Laboratoire de Biodiversité et Biotechnologies Microbiennes, Université de Perpignan Via Domitia, Sorbonne Université, CNRS, UMR 8176 F-66860 Perpignan, France

4S.A.S. AkiNaO, Perpignan, France

5Plateau technique MSXM, Plateforme Bio2mar, Université de Perpignan Via Domitia, 52 Avenue Paul Alduy, 66860 Perpignan Cedex, France

6IHPE, Université Montpellier, CNRS, Ifremer, Université de Perpignan Via Domitia, 66860 Perpignan, France

†These authors contributed equally to this work and share last authorship

S1. Sampling realized after 5 weeks of growth
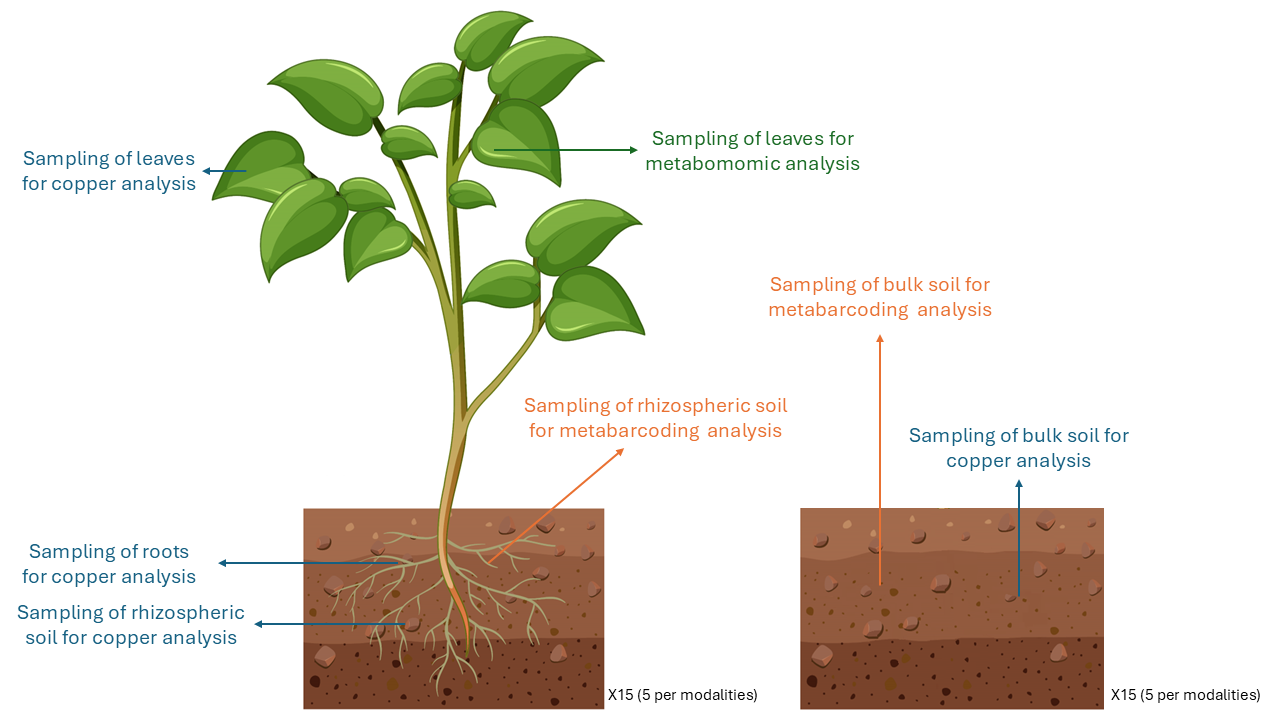


S2. Results of the Box-Behnken design


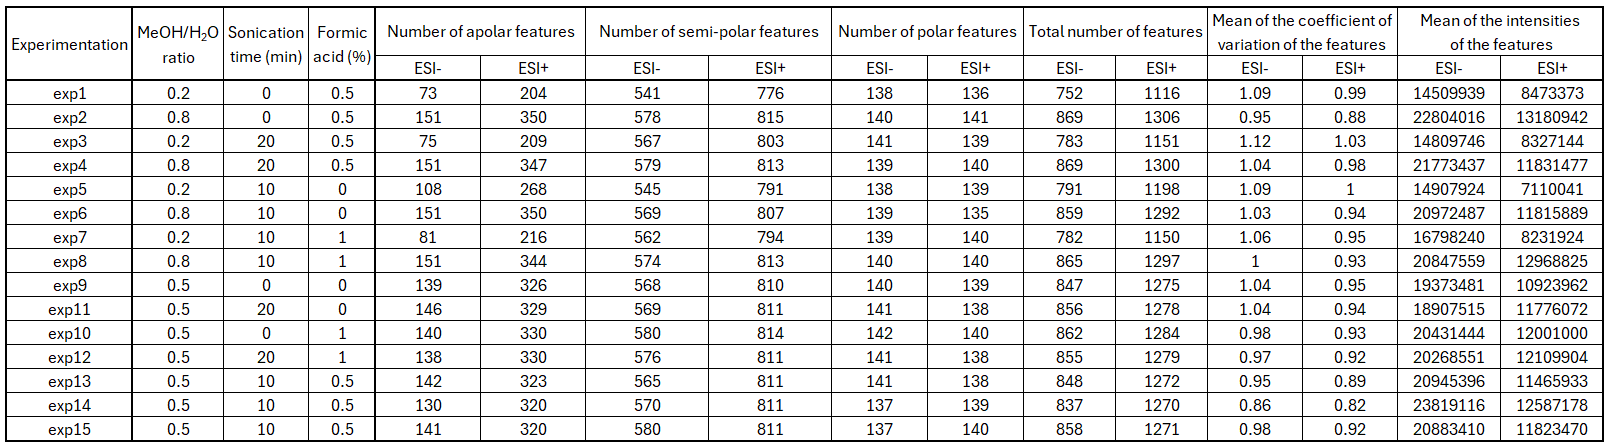


S3. Quantile-quantile plots of the loading scores in ESI-


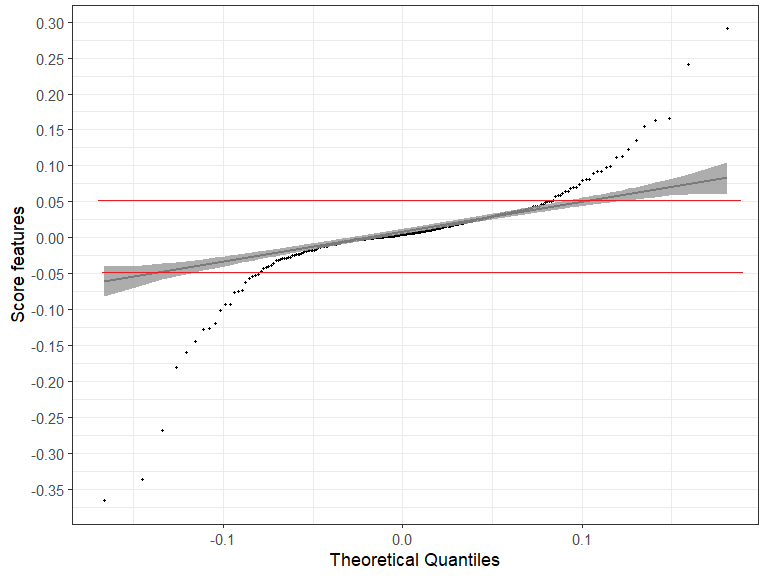


S4. Quantile-quantile plots of the loading scores in ESI+


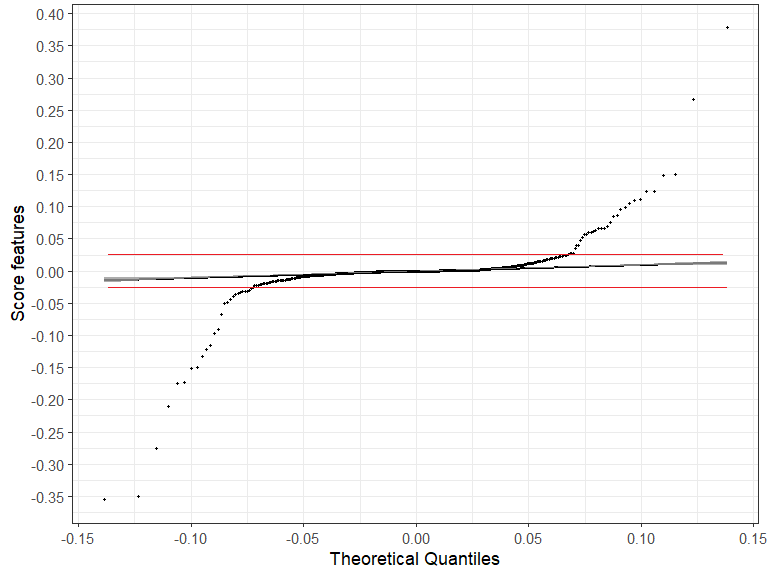


S5: Fragment ions of the proposed metabolites

| Retention  time (min) | [M-H]- | [M+H]+ | Fragment ions | Molecular Formula | Proposed structure |
| --- | --- | --- | --- | --- | --- |
| **Flavonoids** | | | | | |
| Flavanols | | | | | |
| 9.80 | 359.0783 | / | ESI- : 341, 299, 289, 284, 195, 193, 175, 167, 165 (100), 149, 139 | C18H16O8 | 3-O-acetylpadmatin |
| 8.52 | / | 319.0820 | ESI+ : 301, 273, 245, 209, 167 (100), 163, 123 | C16H14O7 | Padmatin |
| Flavanons | | | | | |
| 9.52 | 301.0718 | / | ESI- : 165, 161, 136, 135 (100), 109, 97, 65 | C16H14O6 | 5,3',(4' ou 5')-trihydroxy-7-methoxy flavanon |
| 8.92 | 271.0609 | / | ESI- : 177, 151 (100), 119, 107, 93, 73 | C15H12O5 | Naringenin |
| Flavonols | | | | | |
| 9.35 | 329.0678 | 331.0808 | ESI- : 314 (100), 299, 286, 285, 271, 257, 243 ESI+ : 316 (100), 301, 298, 297, 281, 273 | C17H14O7 | (3,3' ou 3,4')-di-O-methylquercetin  3,7-di-O-methylquercetin |
| 8.57 | / | 317.0662 | ESI+ : 303, 302 (100), 301, 274, 140, 137, 79 | C16H12O7 | 3-O-Methylquercetin |
| 8.38 | / | 303.0496 | ESI+ : 285, 257 (100), 229, 165, 153, 140, 137 | C15H10O7 | Quercetin |
| Flavons | | | | | |
| 8.40 | 315.0521 | / | ESI- : 301, 300 (100), 272, 271, 228, 216, 200, 166, 137, 133, 96 | C16H12O7 | 6-Methoxyluteolin 3-Methylquercetin |
| 9.03 | 299.0558 | 301.0702 | ESI- : 285, 284 (100), 283, 271, 256, 228, 227, 212, 137 ESI+ : 286 (100), 283, 255, 186, 184, 168, 140, 75, 73 | C16H12O6 | 6-Methoxyapigenin |
| 8.37 | 285.0414 | / | ESI- : 241, 217, 199, 175, 151 (100), 149, 133, 71 | C15H10O6 | Luteolin |
| Chalcons | | | | | |
| 8.25 | / | 289.0708 | ESI+ : 271, 187, 179, 171, 163 (100), 153, 145 | C15H12O6 | 3,4,2',4',6'-Pentahydroxychalcon |
| **Hydroxycinnamic acids derivatives** | | | | | |
| Quinic acids derivatives | | | | | |
| 0.75 | 191.0562 | / | ESI- : 173, 127, 111, 93, 87, 85 (100), 59 | C7H12O6 | Quinic acid |
| 5.88 | / | 355.1028 | ESI+ : 226, 209, 181, 172, 171, 164, 163 (100), 148, 145, 140, 135, 97, 83, 73, 59 | C16H18O9 | (3 ou 5)-caffeoylquinic acid |
| 7.25 | 515.1185 | 517.1358 | ESI- : 355, 354, 353, 193, 192, 191 (100), 181, 180, 179, 173, 161, 136, 135 ESI+ : 499, 337, 319, 163 (100),145, 135, 117 | C25H24O12 | Dicaffeoylquic acid |
| 6.35 | 337.0937 | / | ESI- : 191 (100), 173, 163, 119, 111, 93, 87 | C16H18O8 | (3 ou 5)-coumaroylquinic acid |
| 8.05 | 483.1290 | / | ESI- : 337, 319, 191, 145, 163 (100), 119 | C25H24O10 | Dicoumaroylquinic acid |
| 7.67 | 499.1262 | 501.1408 | ESI- : 337, 191 (100), 173, 163, 161, 119, 93 ESI+ : 483, 319, 303, 164, 163 (100), 148, 147, 145, 135, 119 | C25H24O11 | Caffeoylcoumaroylquinic acid |
| Hexaric acids derivatives | | | | | |
| 0.7 | 209.0304 | / | ESI- : 191, 147, 133, 129, 101, 89, 85 (100), 71, 59, 57 | C6H10O8 | Hexaric acid |
| 8.08 | 857.1555 | / | ESI- : 695, 533, 371, 353, 209 (100), 191, 179, 161, 147, 129, 85 | C42H34O20 | Tetracaffeoylhexaric acid |
| **Others** | | | | | |
| 0.7 | / | 118.0867 | ESI+ : 101, 91, 85, 75, 73, 72, 69, 59 (100), 58, 57, 56 | C5H11NO2 | Glycine betaine |
| 1.62 | 117.0195 | / | ESI- : 100, 99, 73 (100) | C4H6O4 | Succinic acid |

S6: Boxplots of the discriminant variables where a structure has been proposed


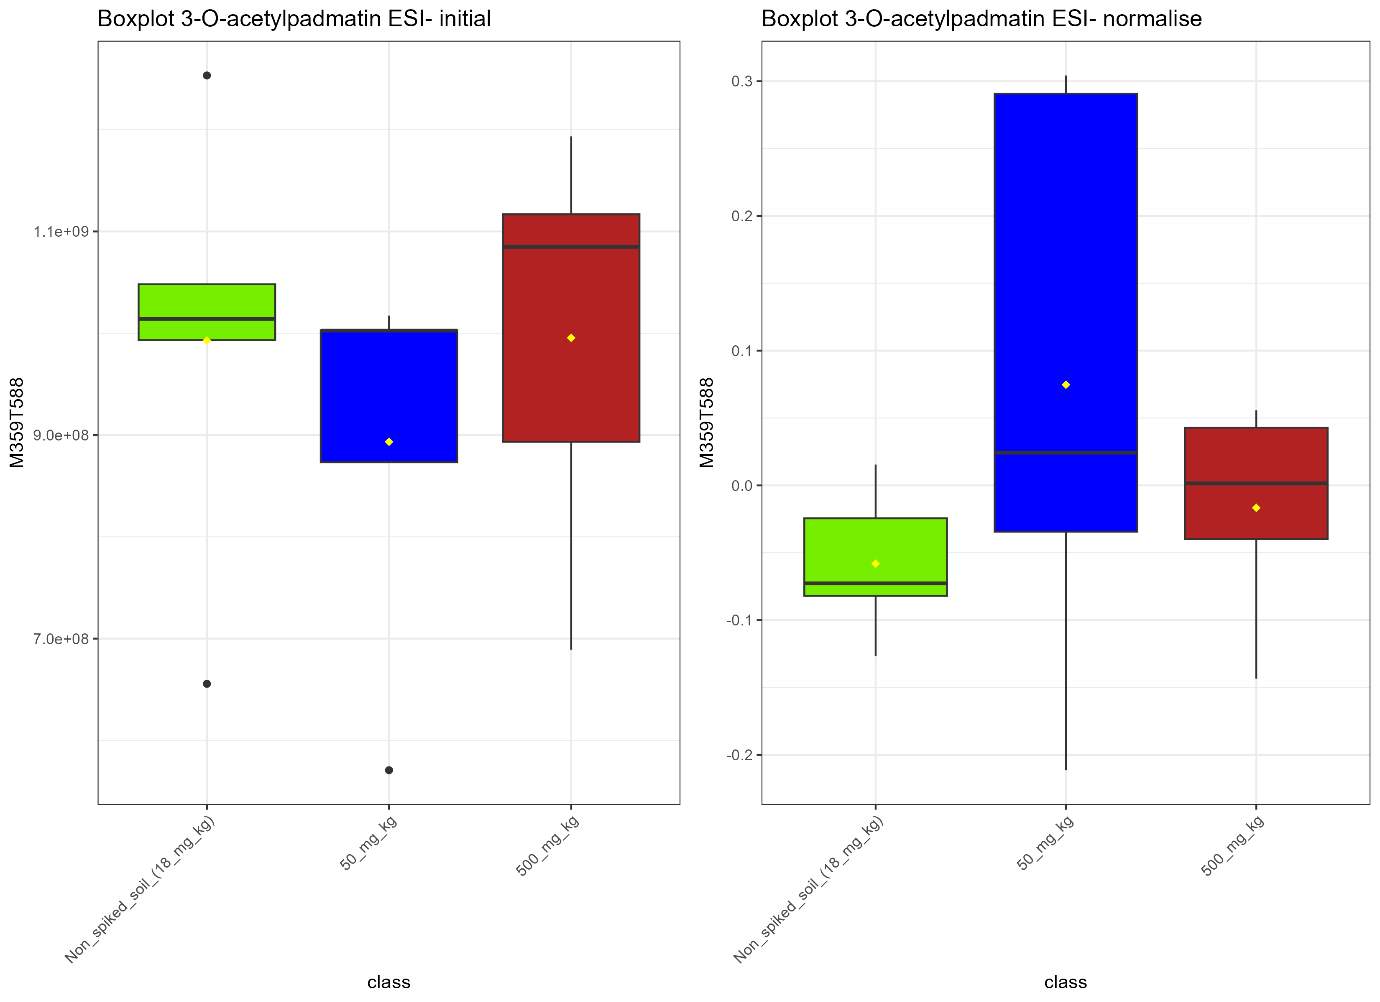


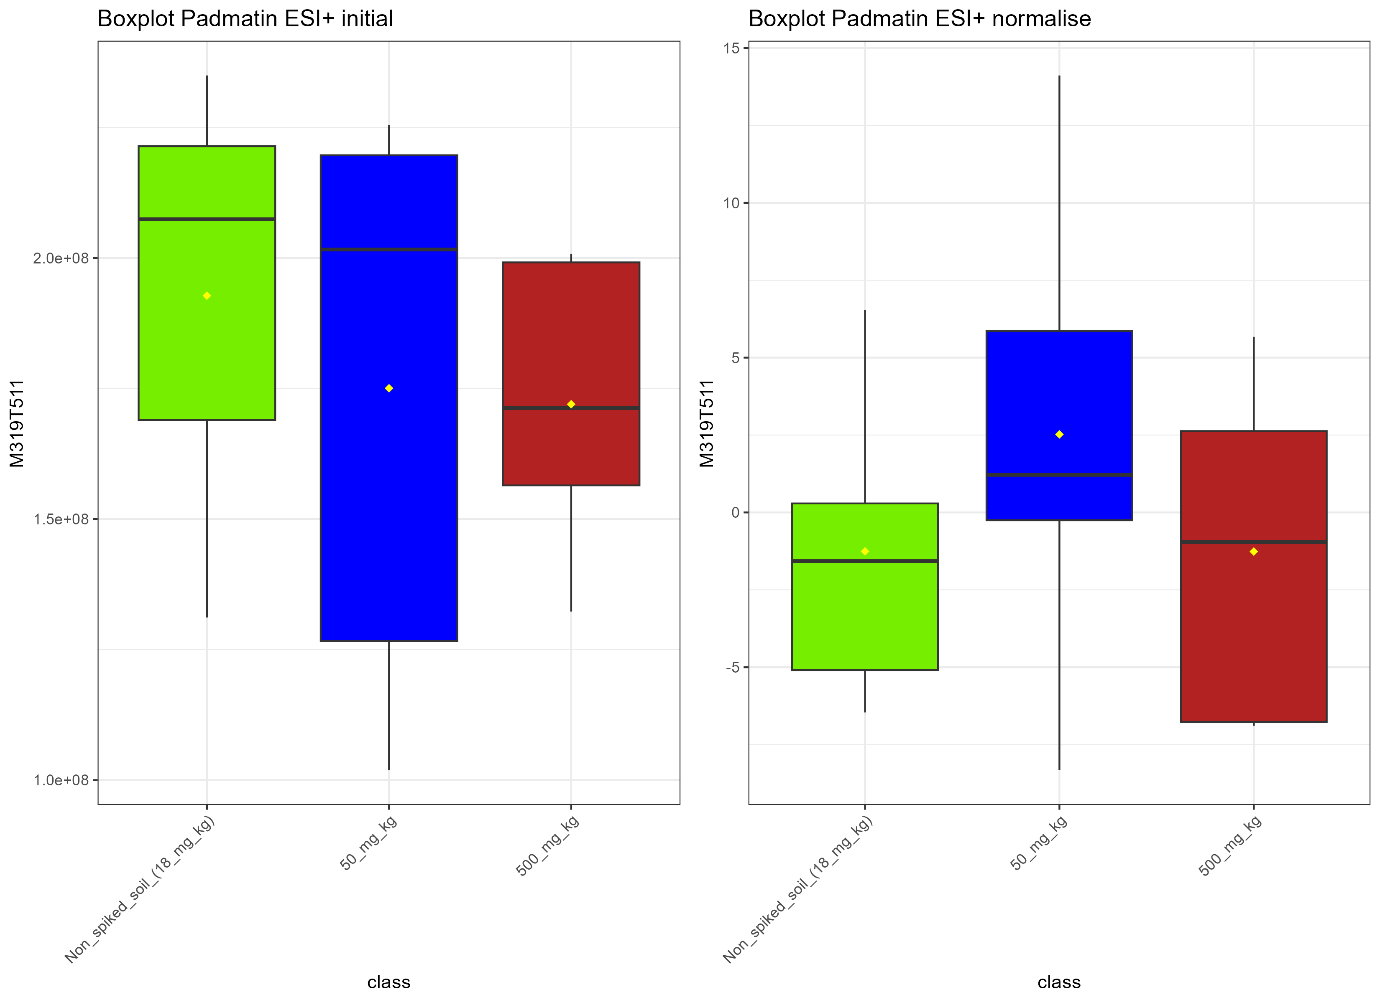


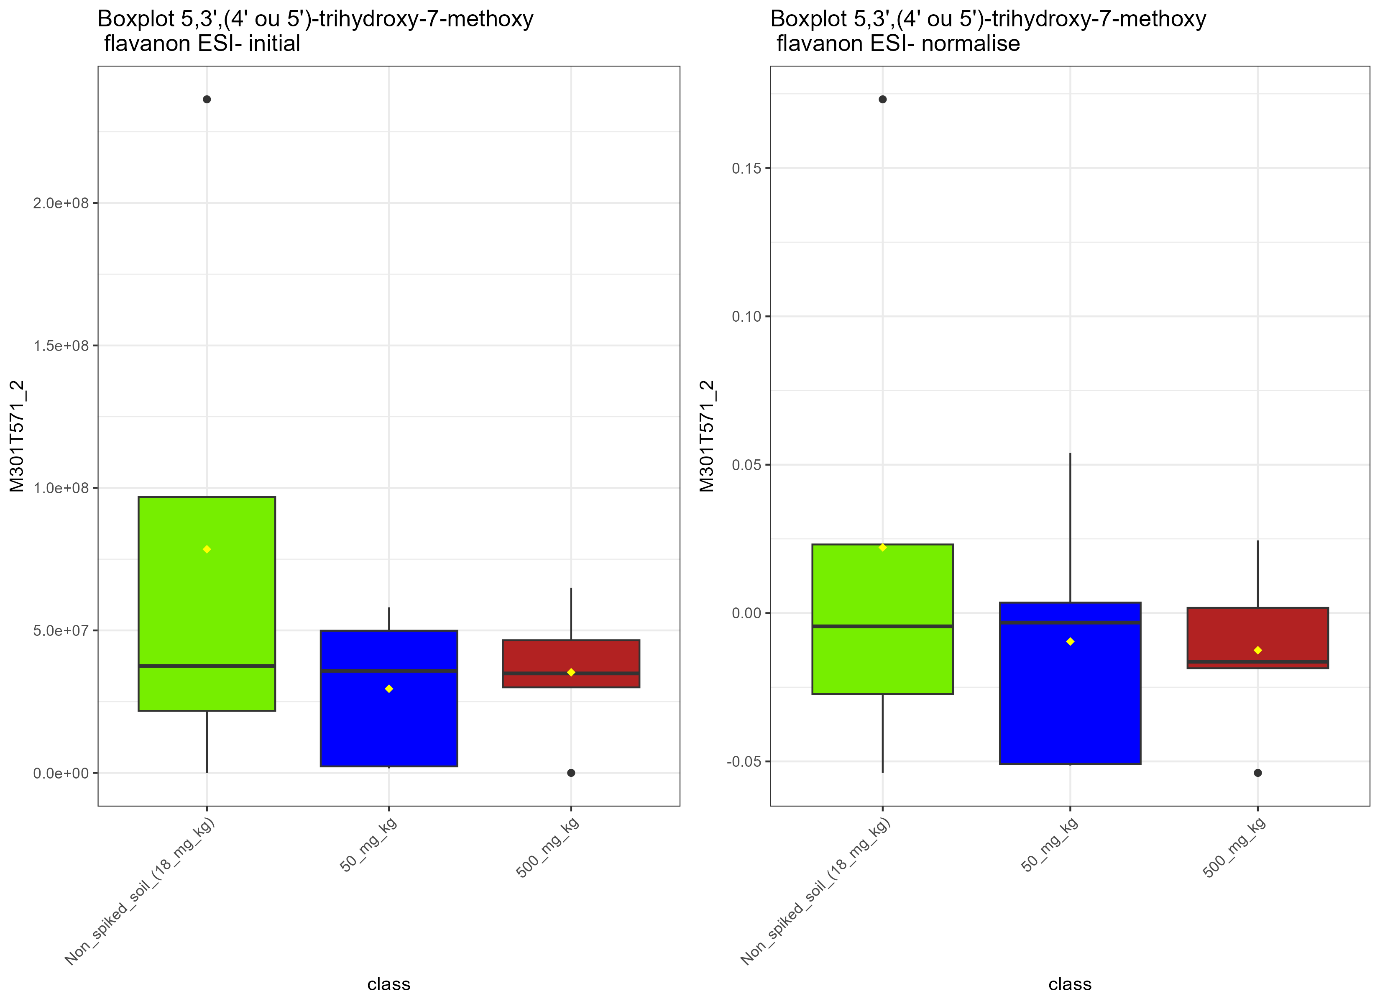


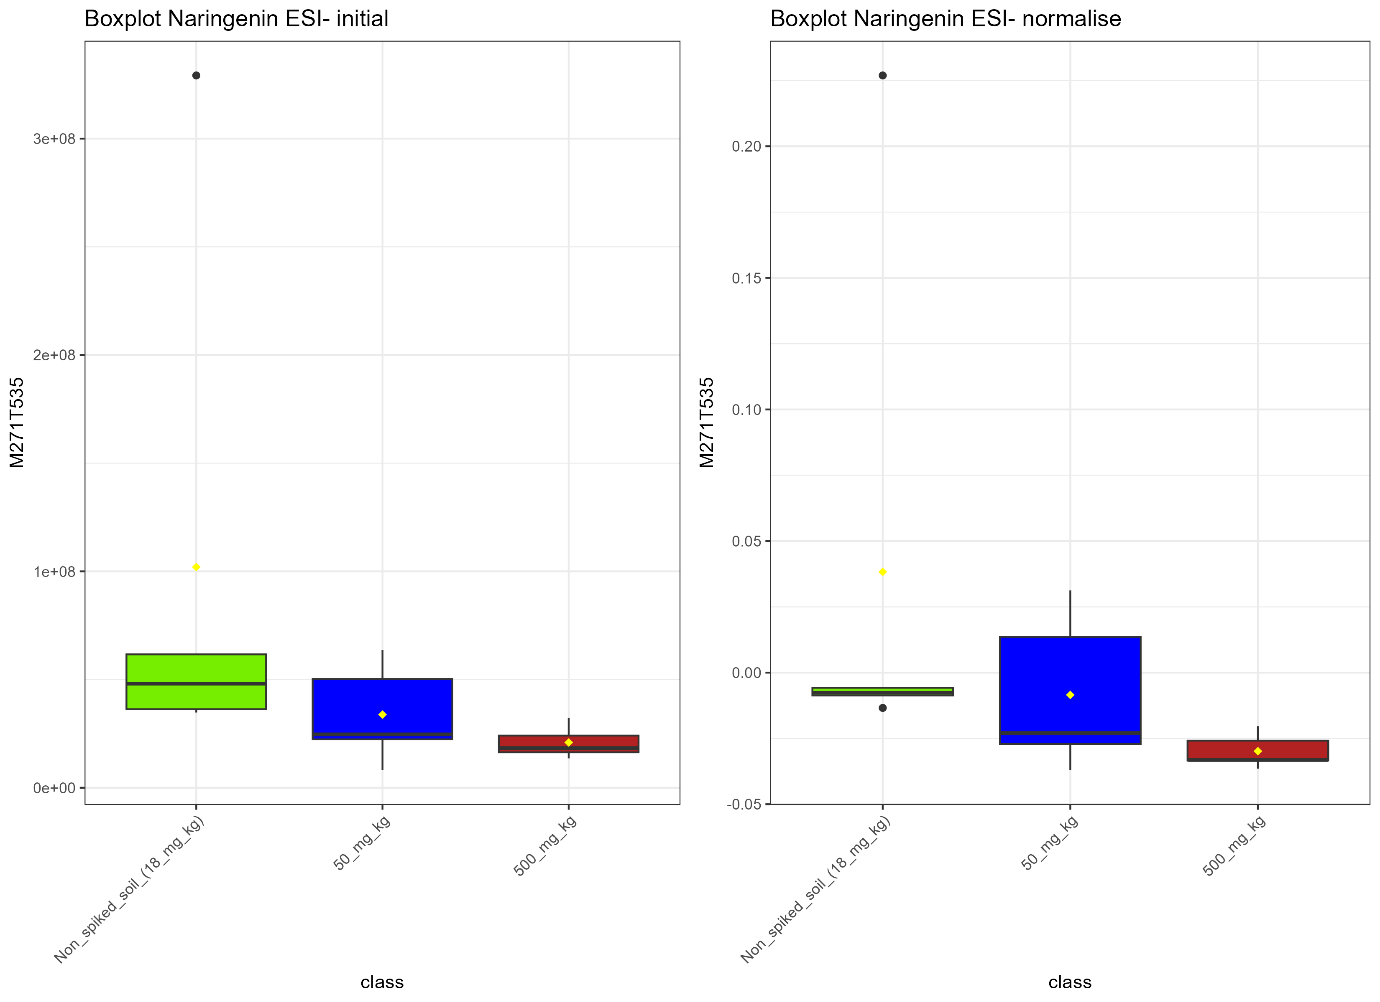


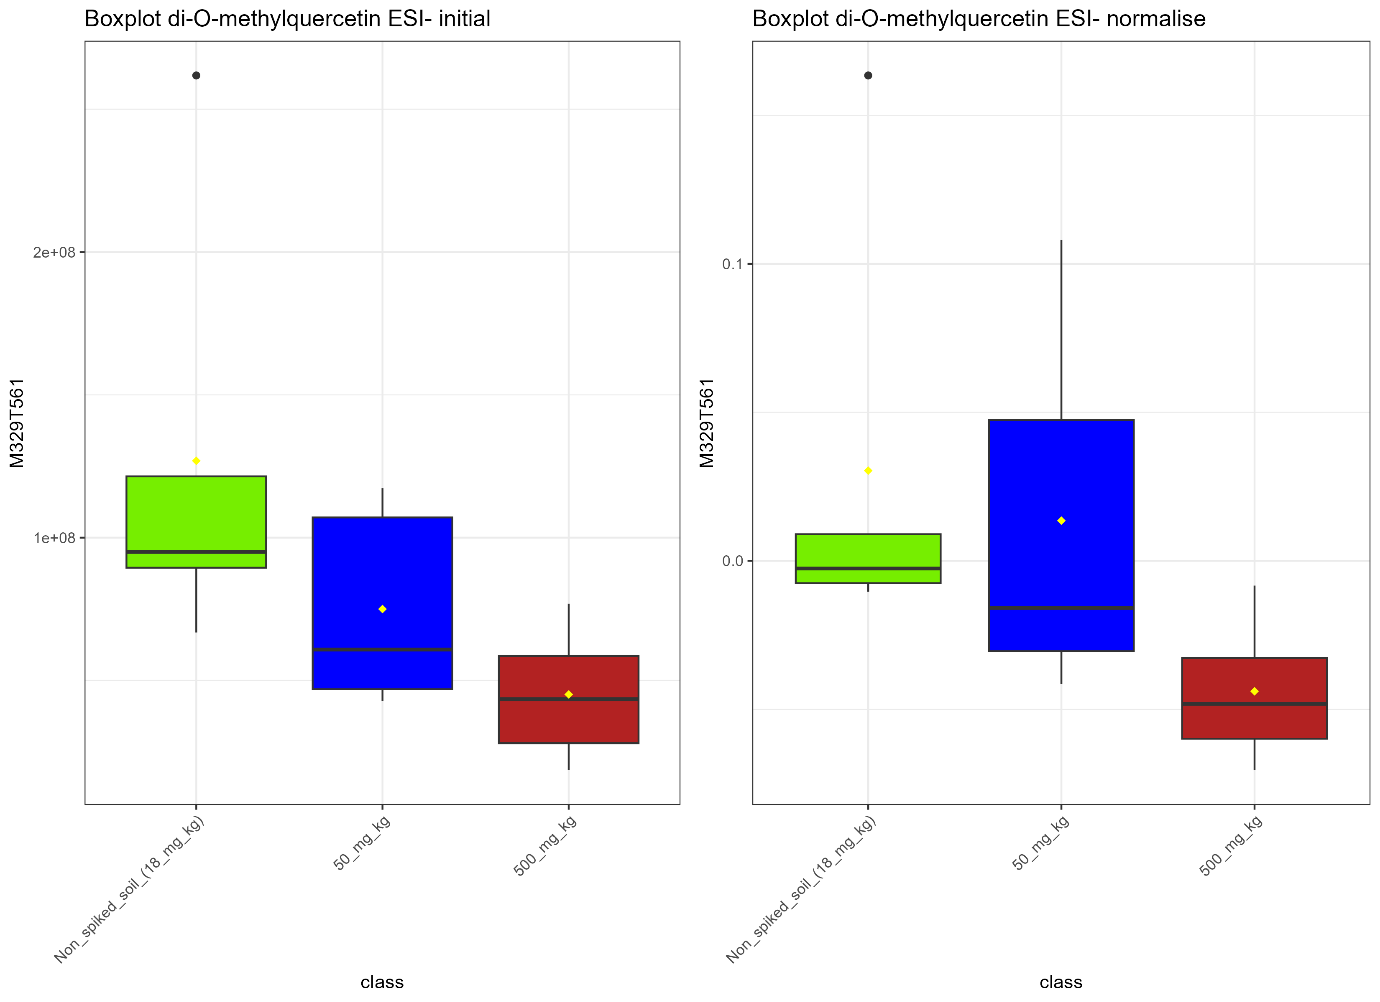


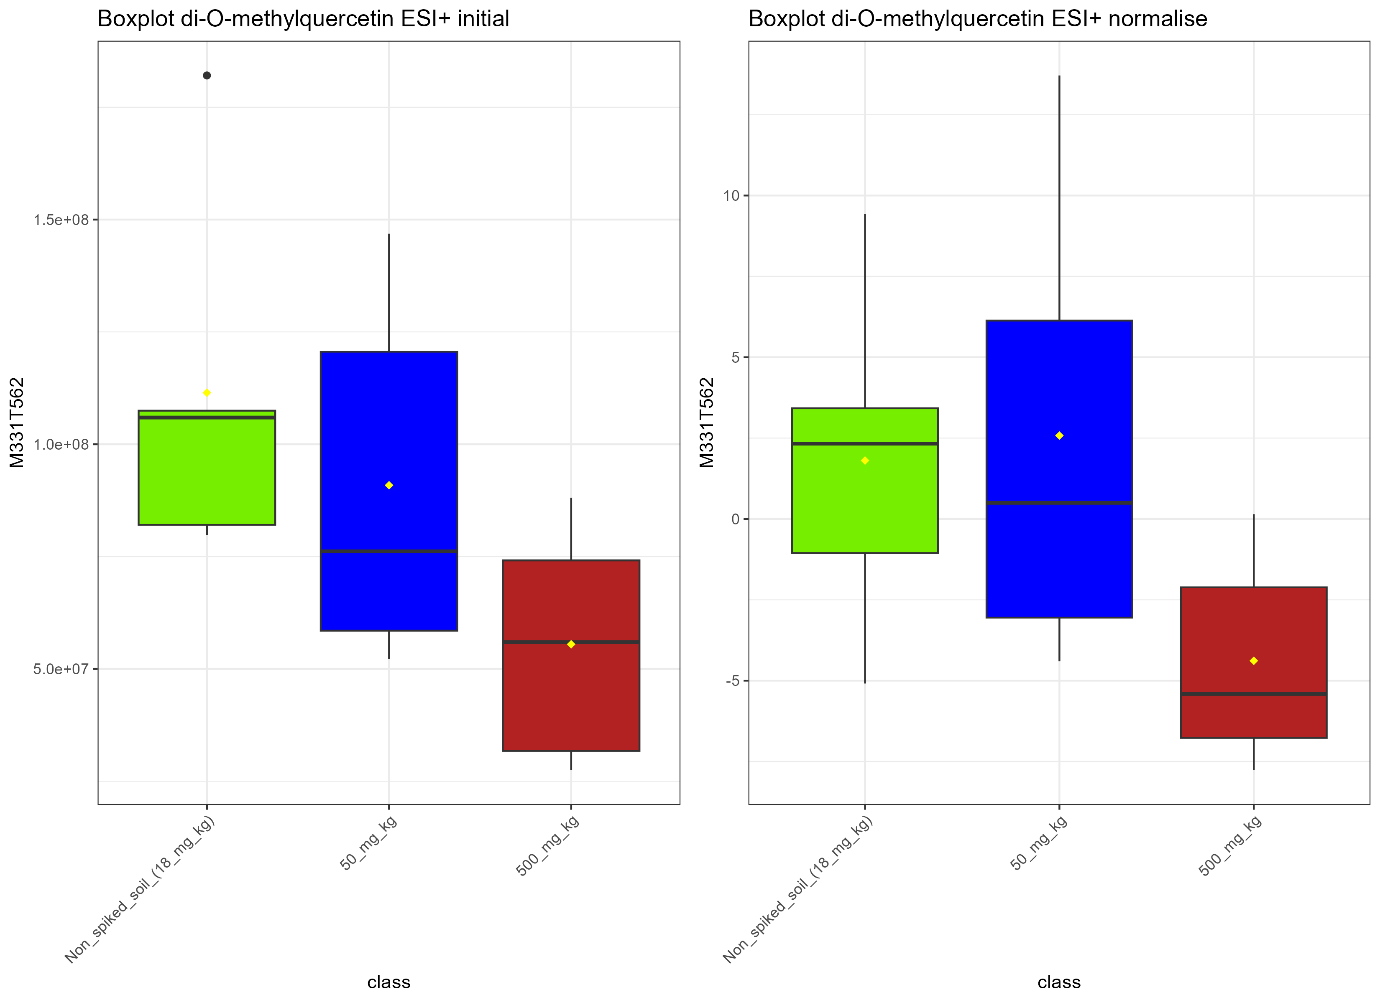


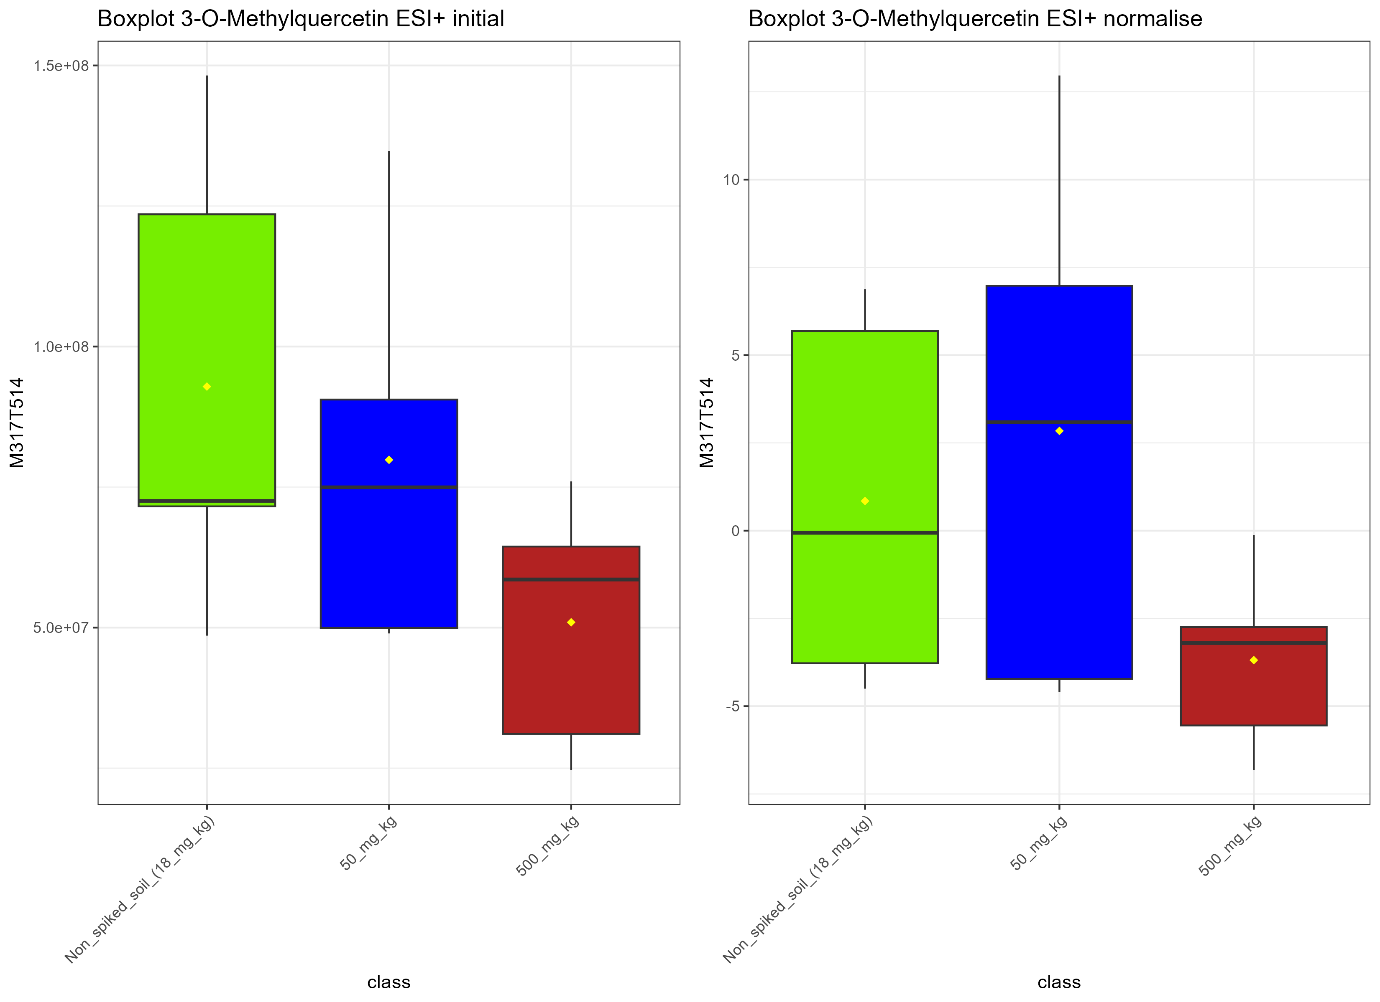


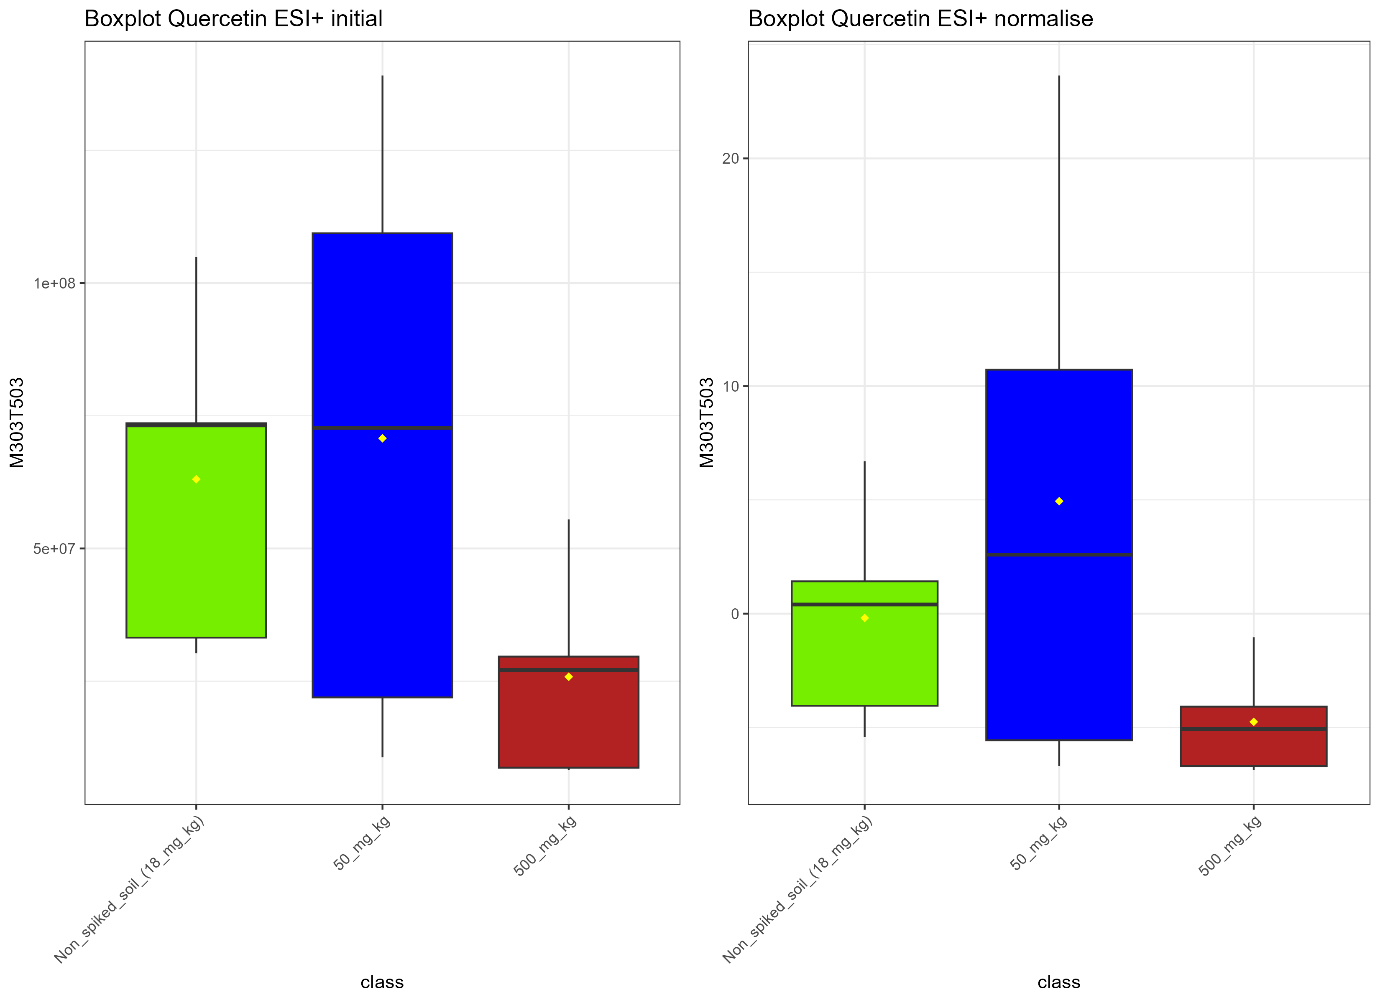


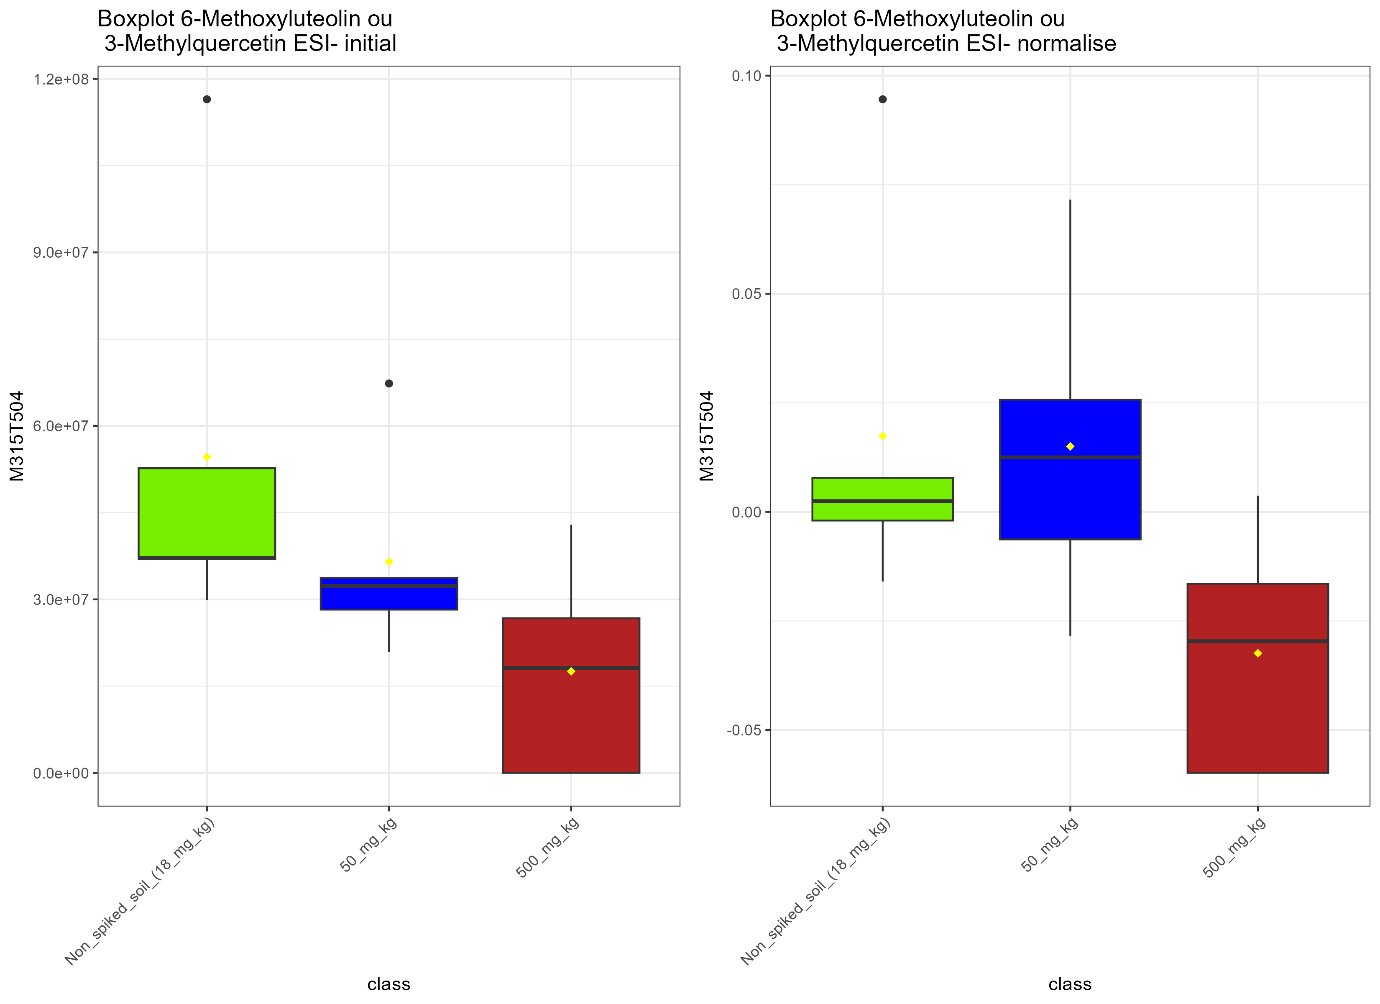


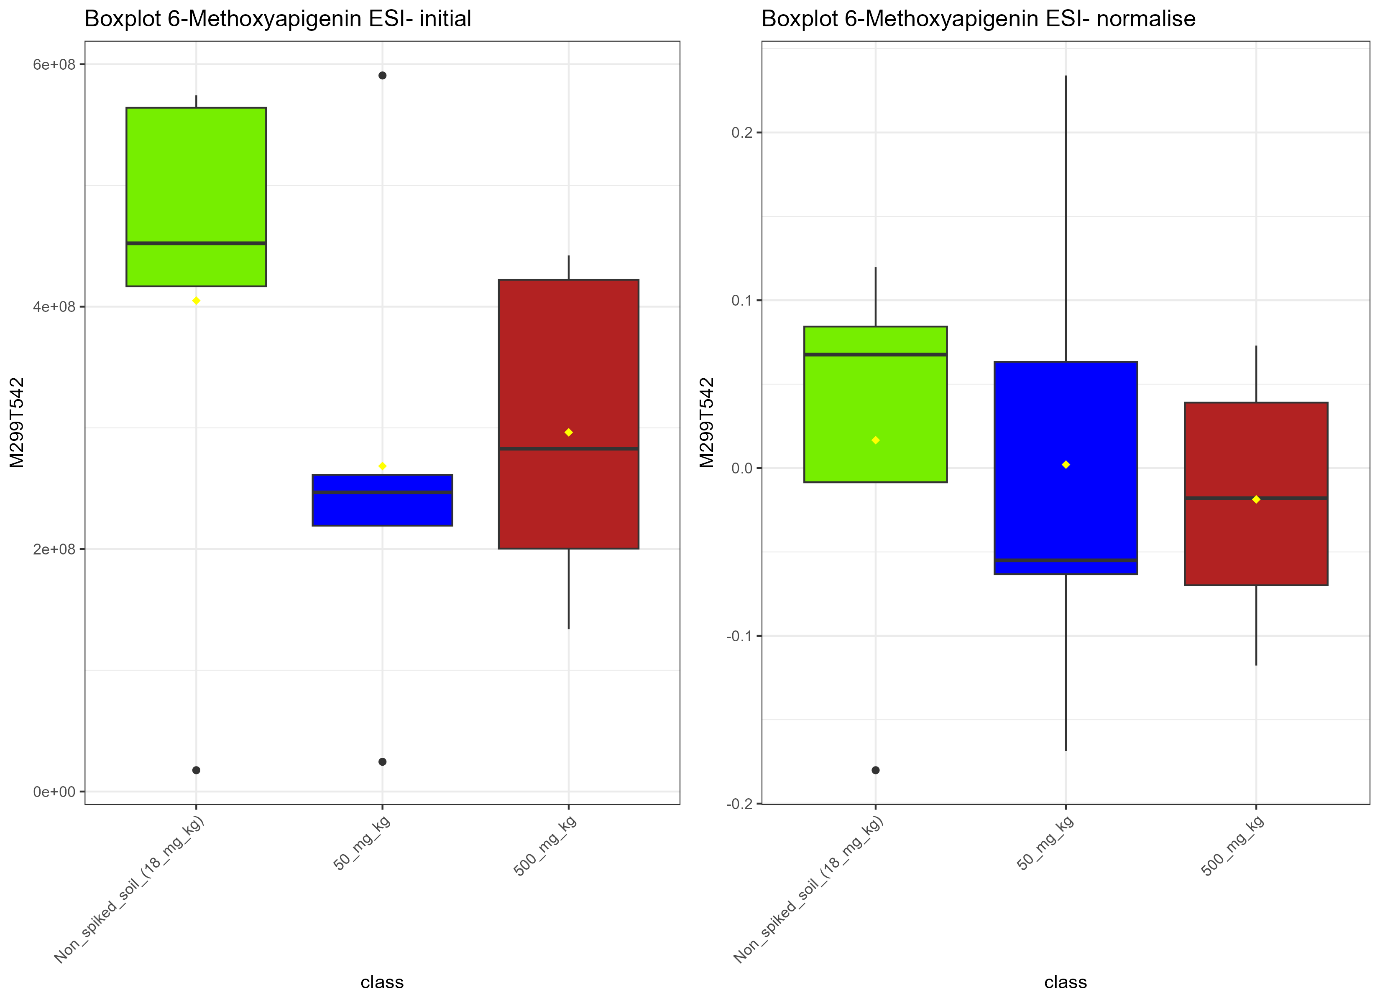


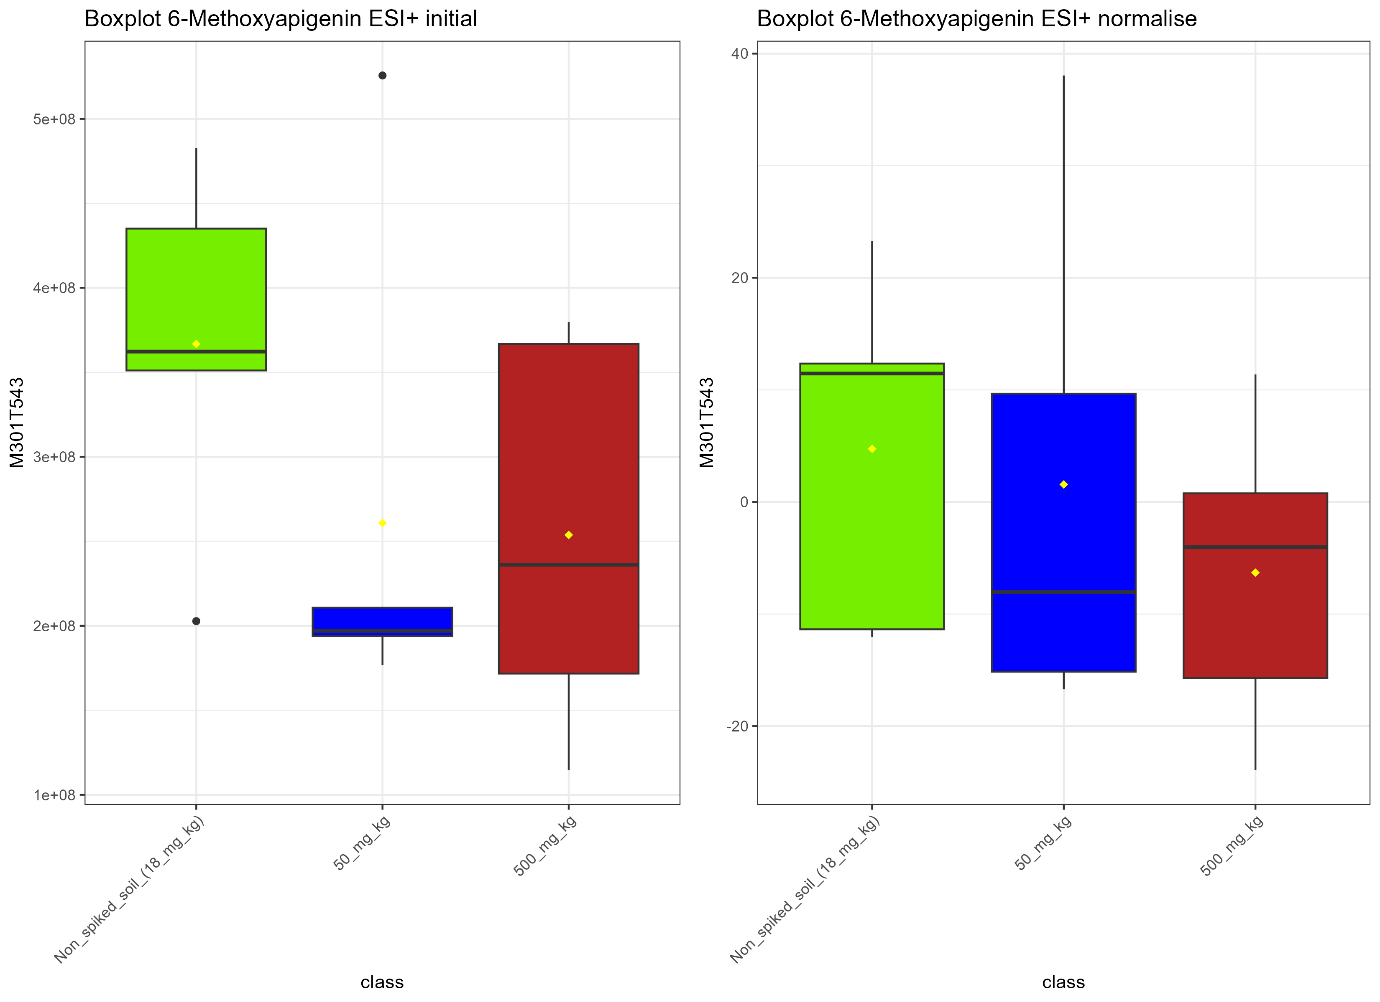


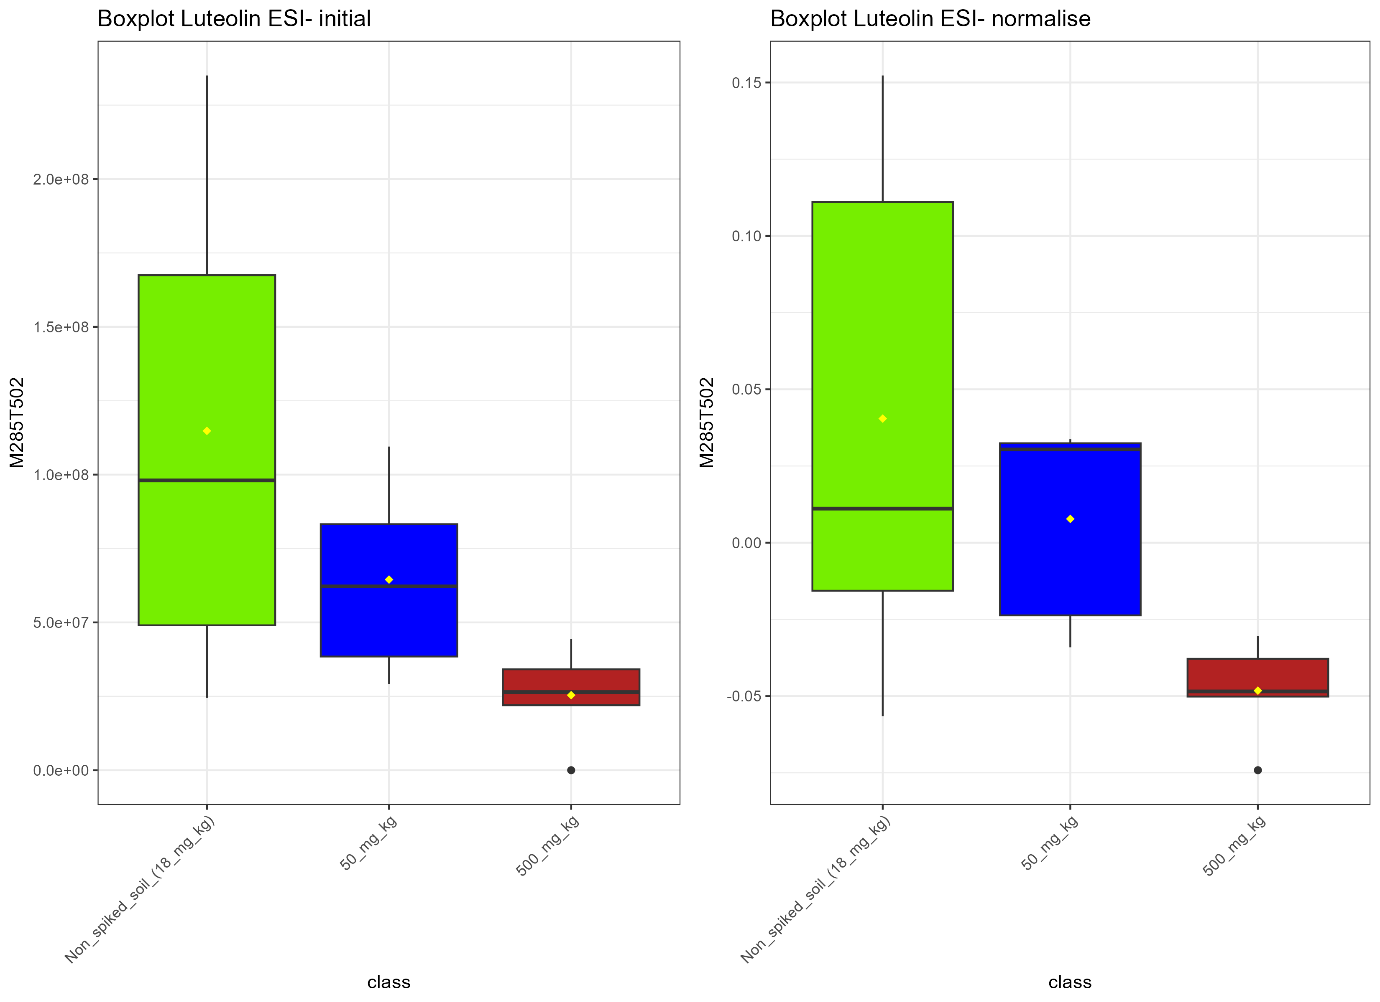


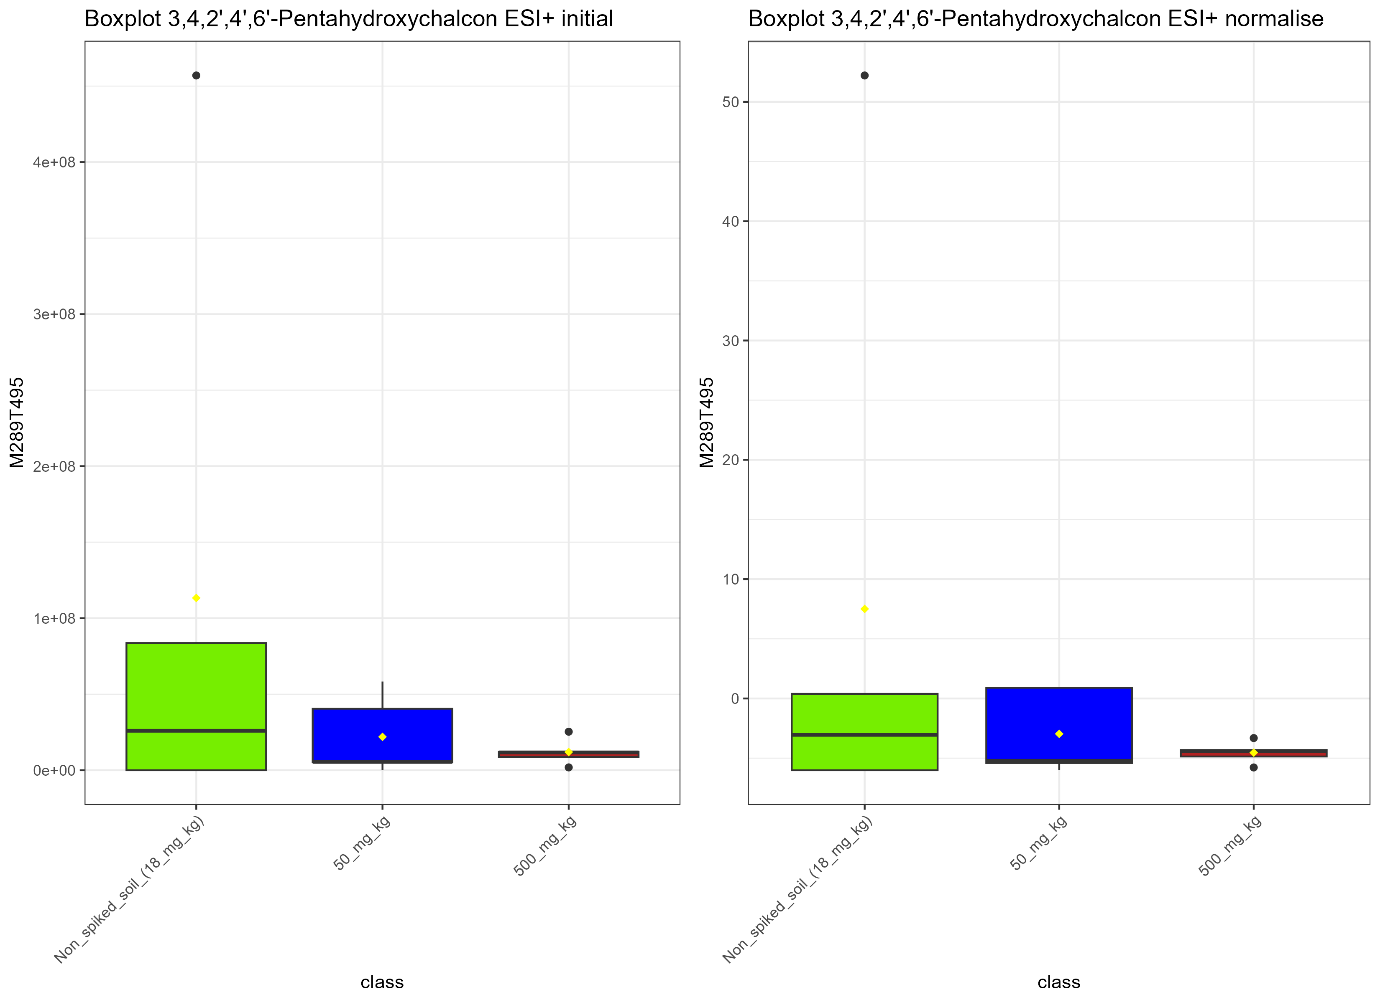


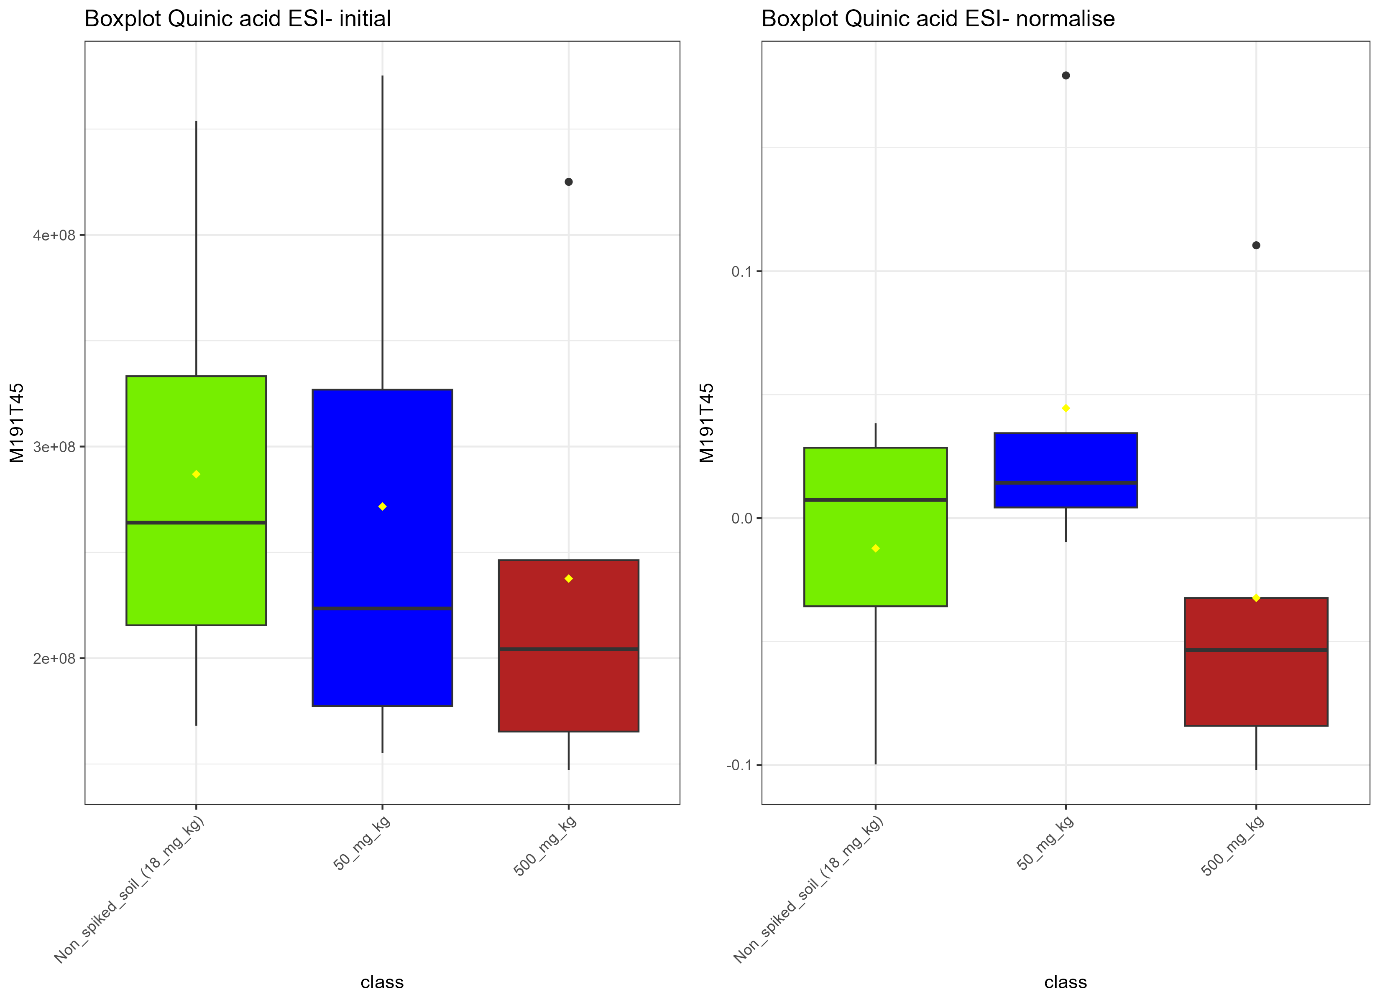


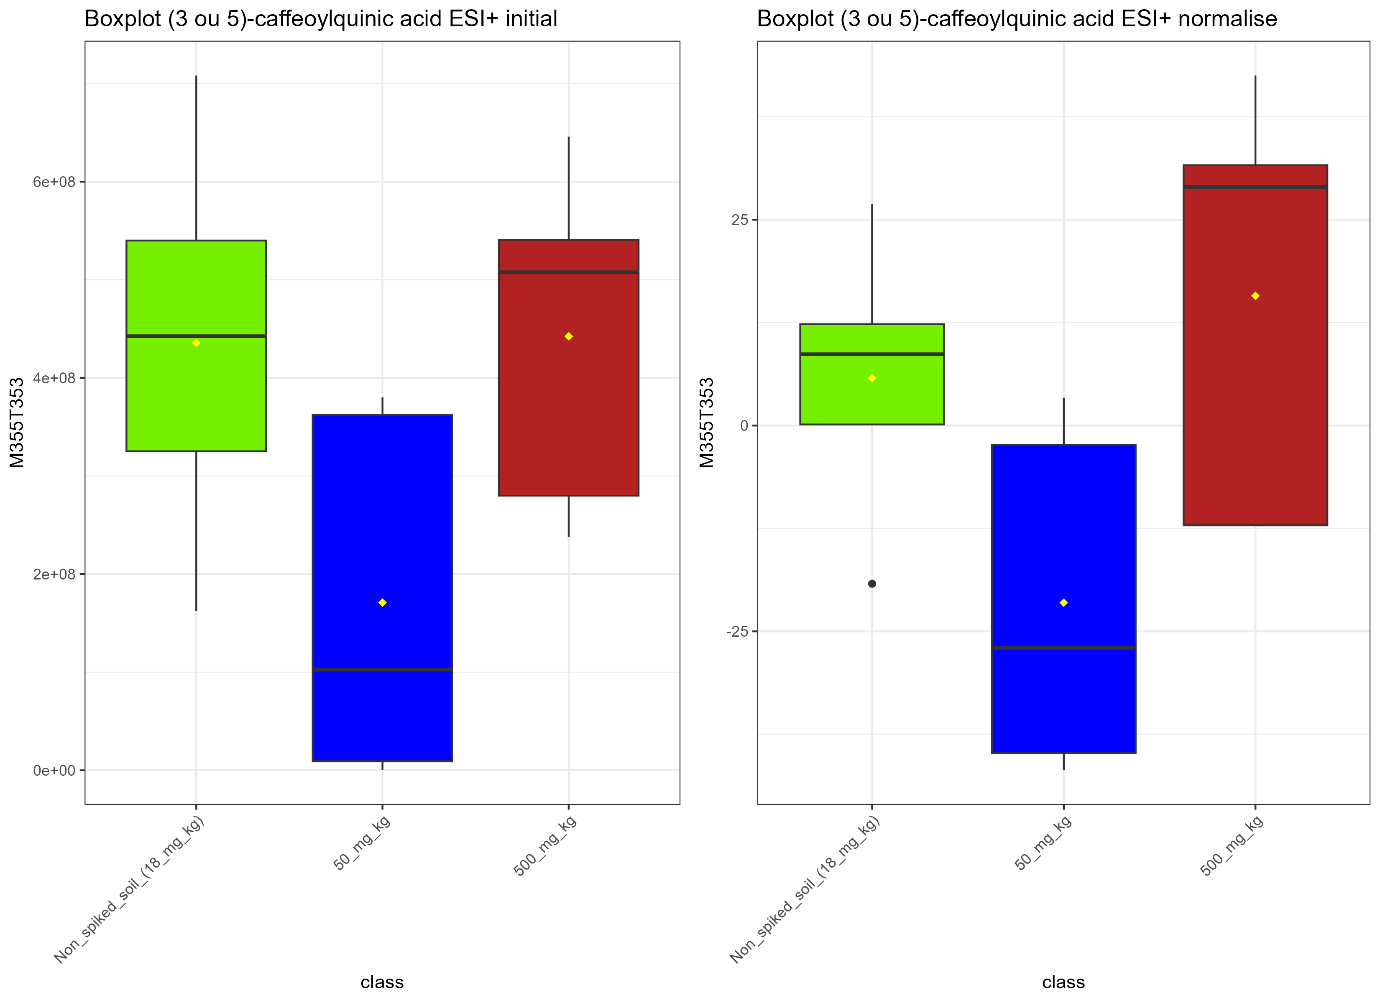

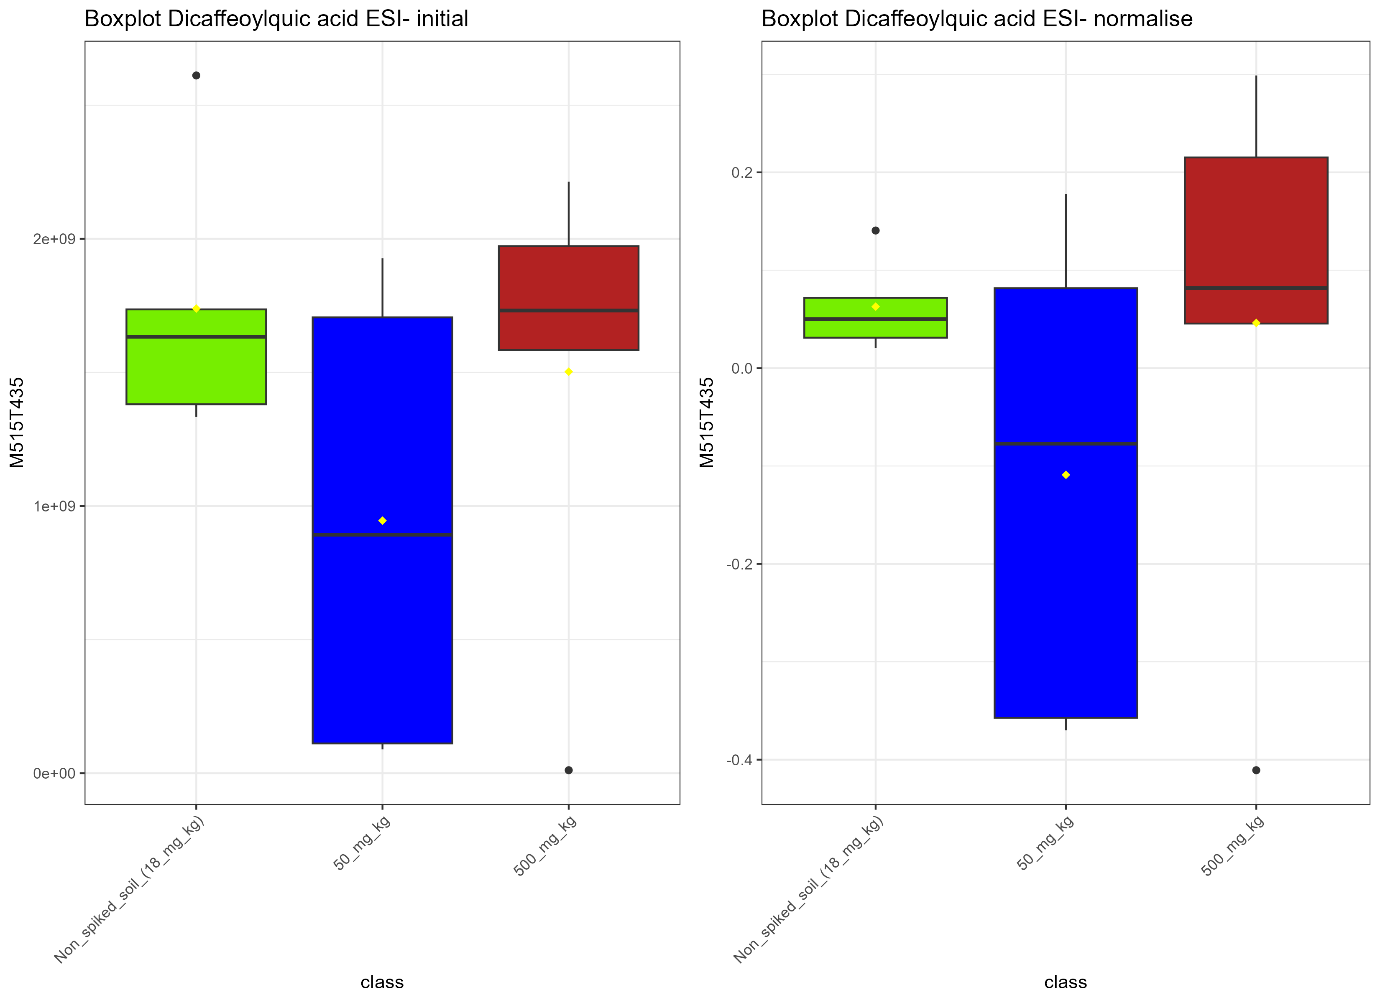


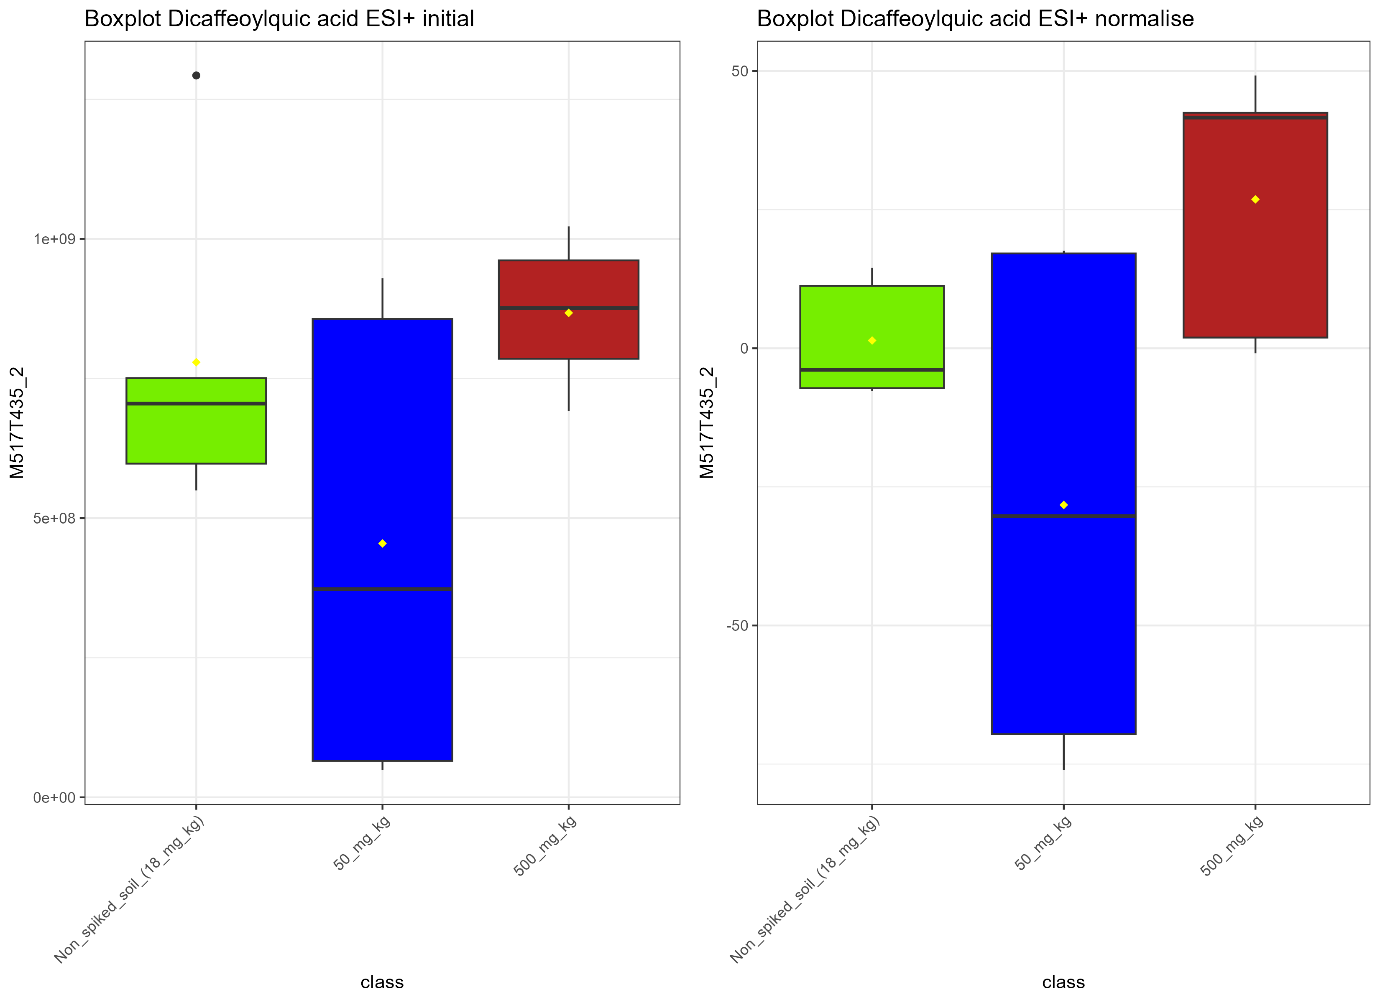


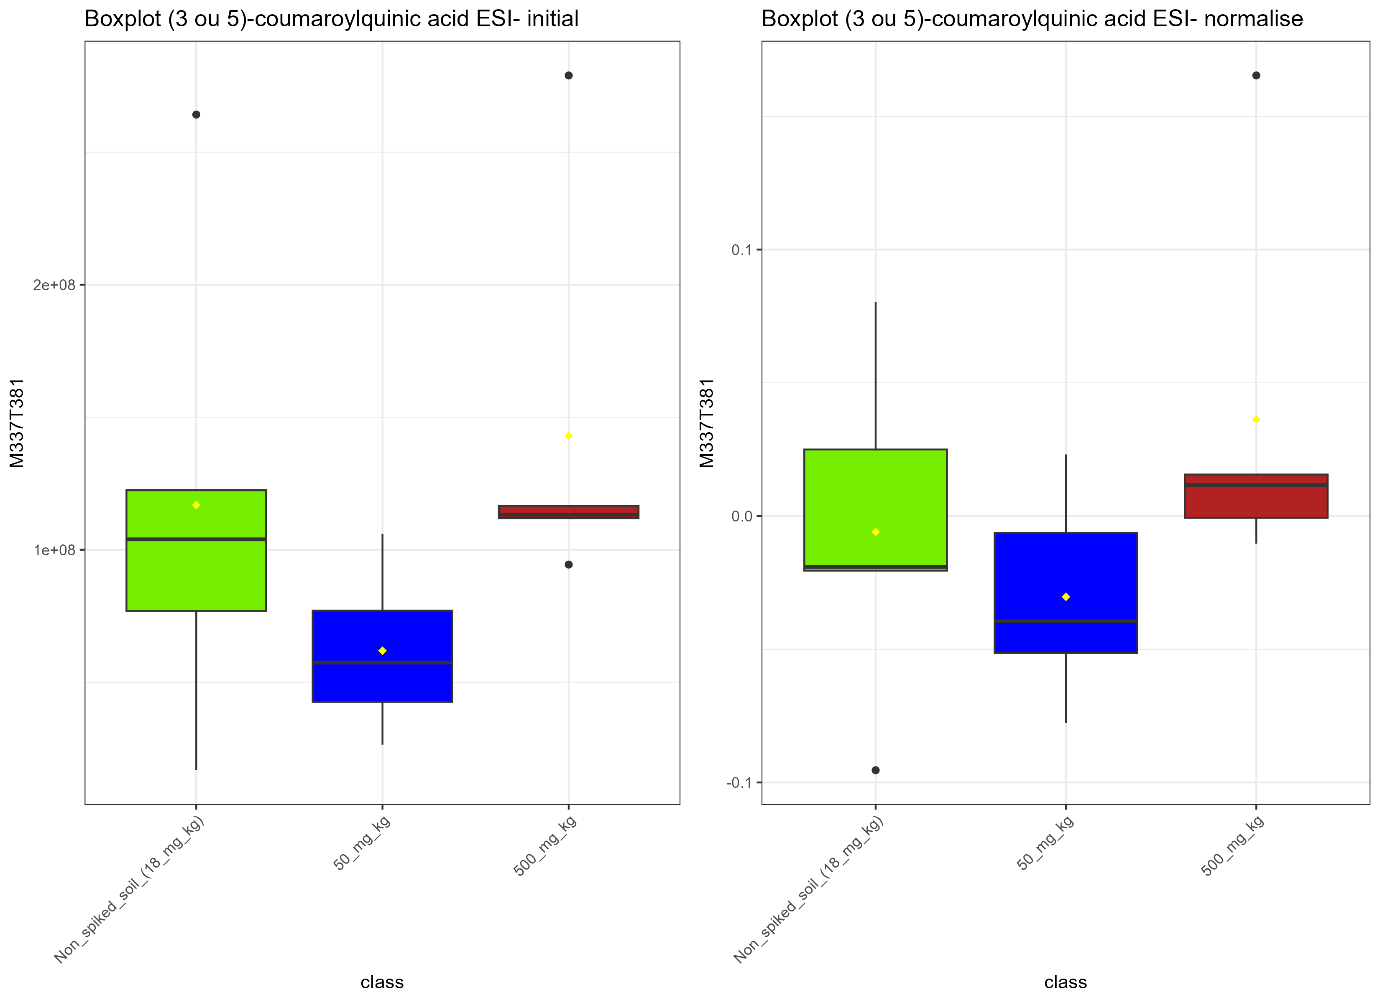


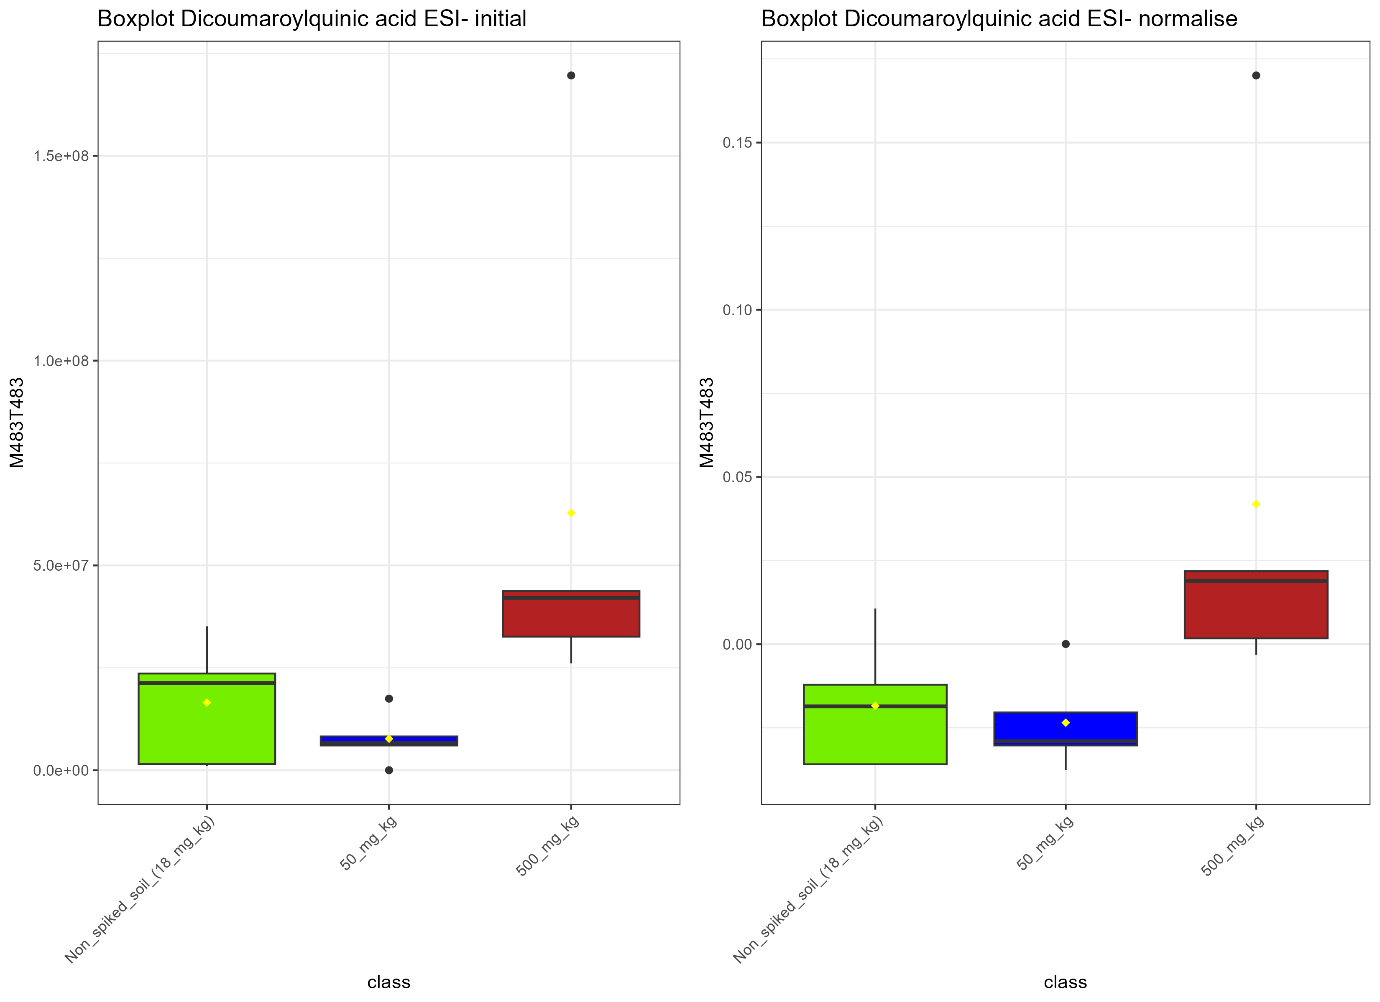

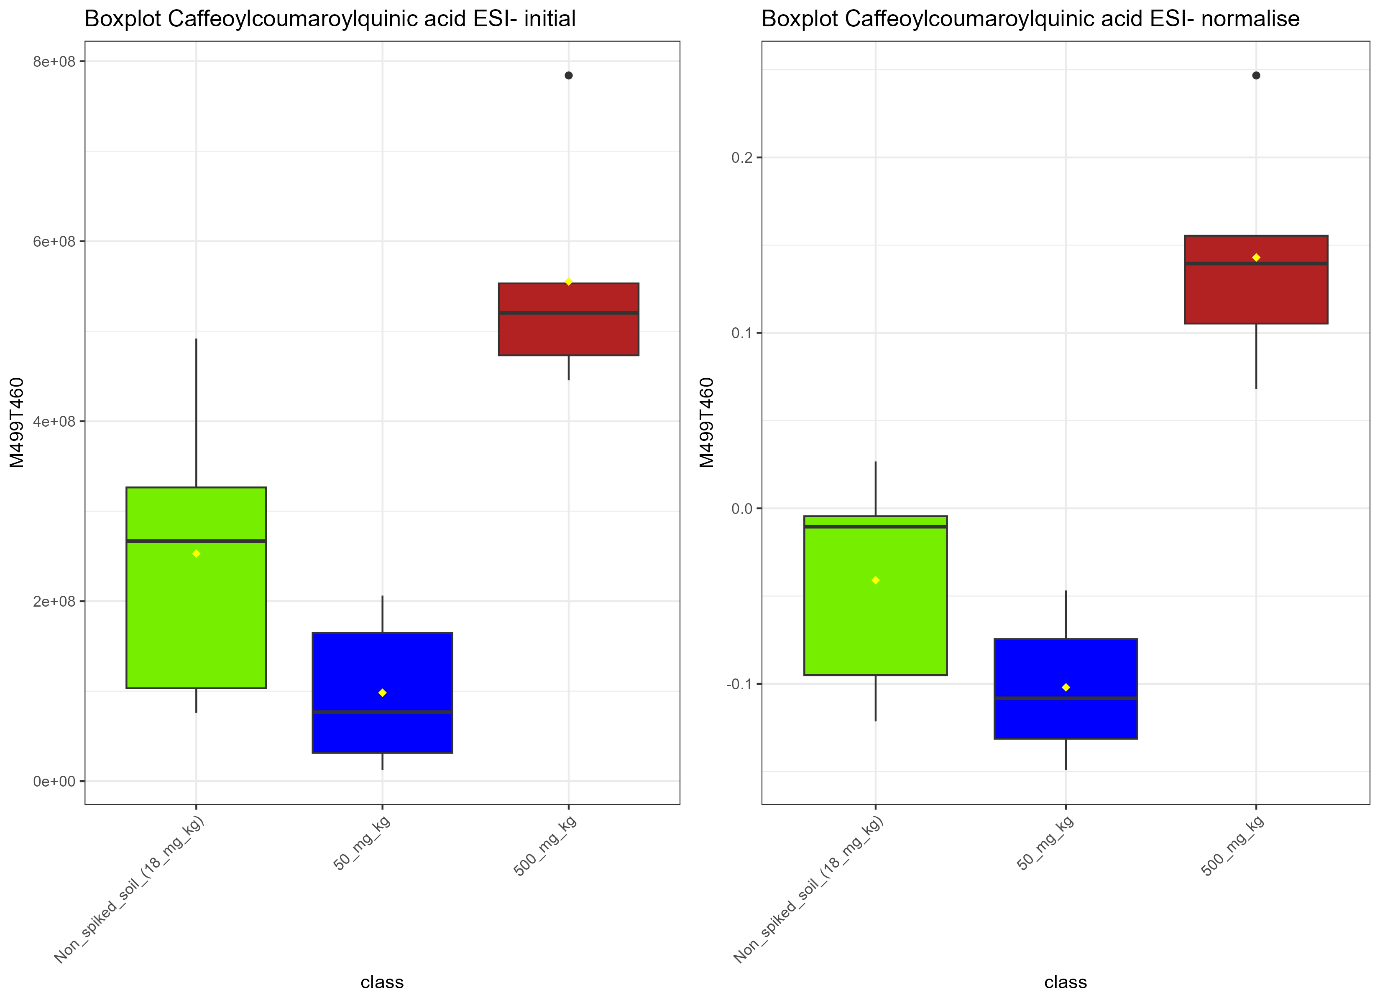


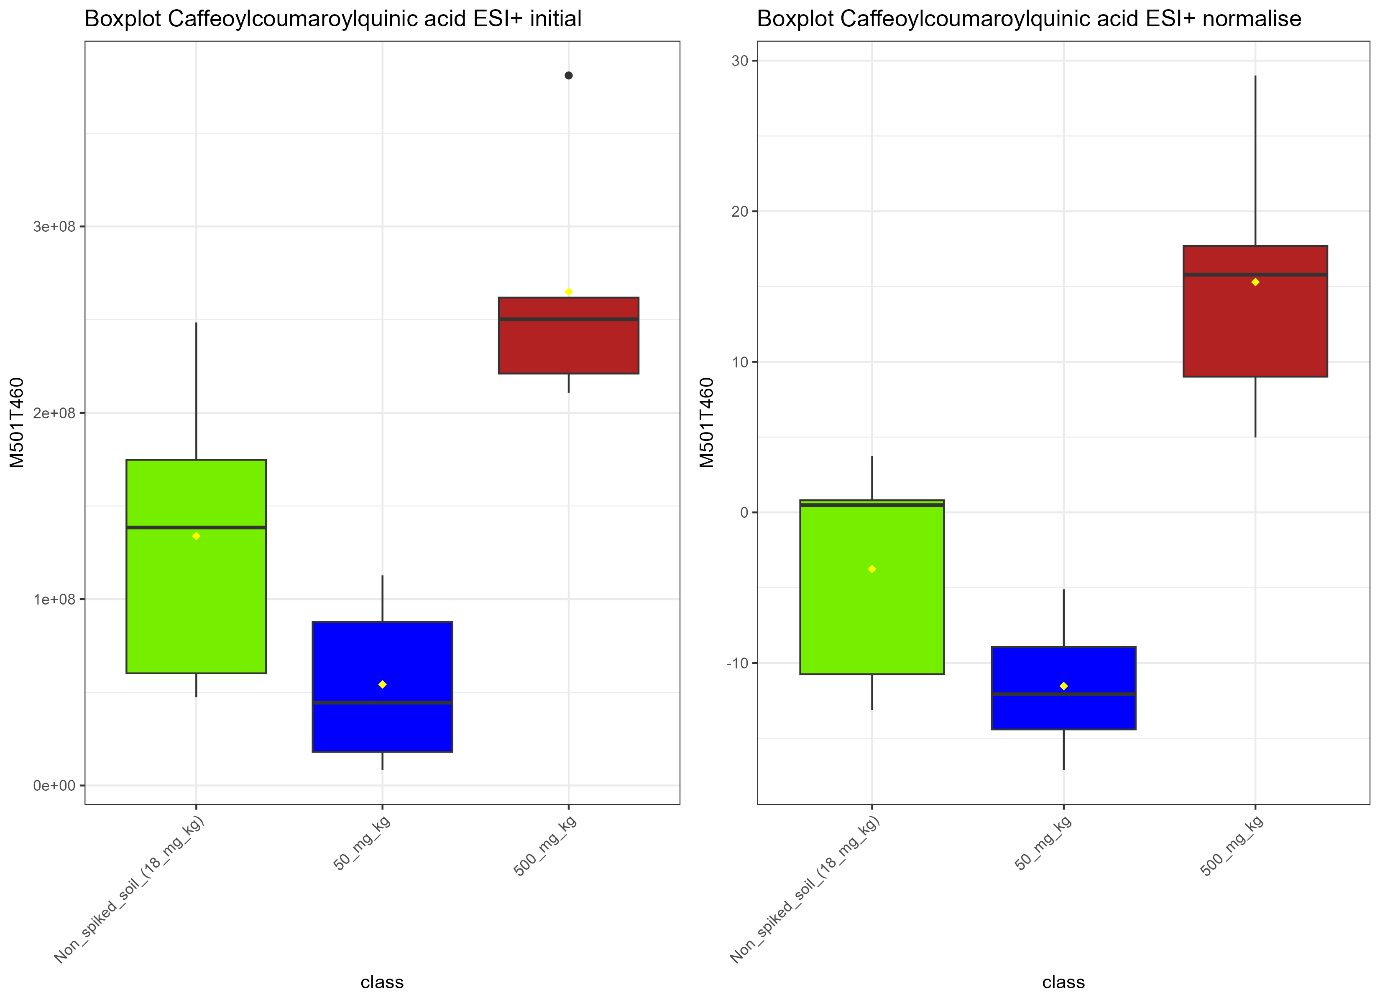


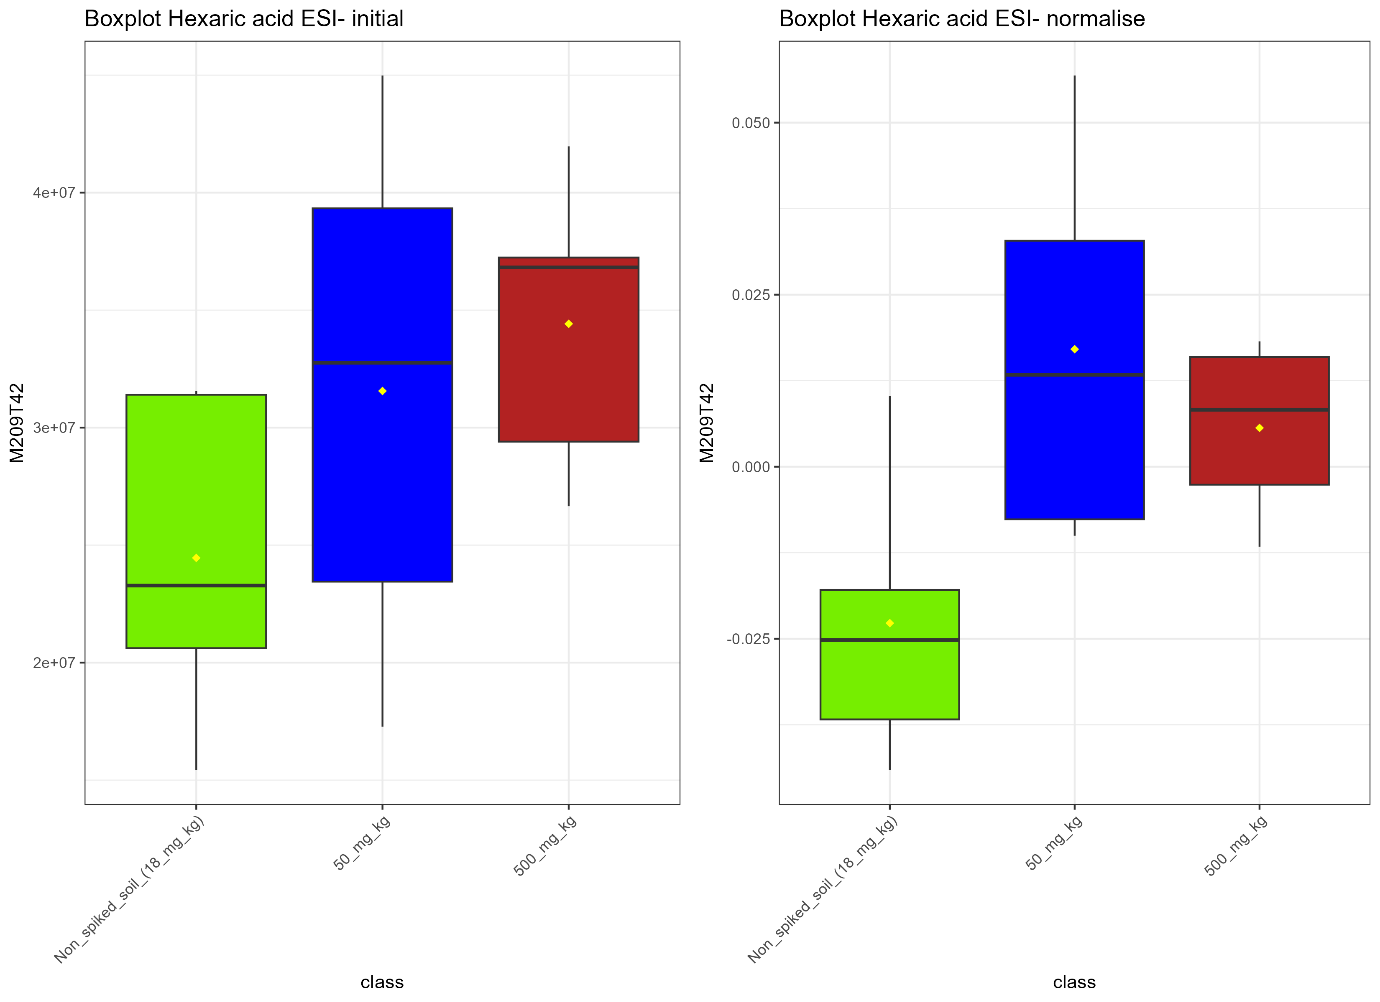


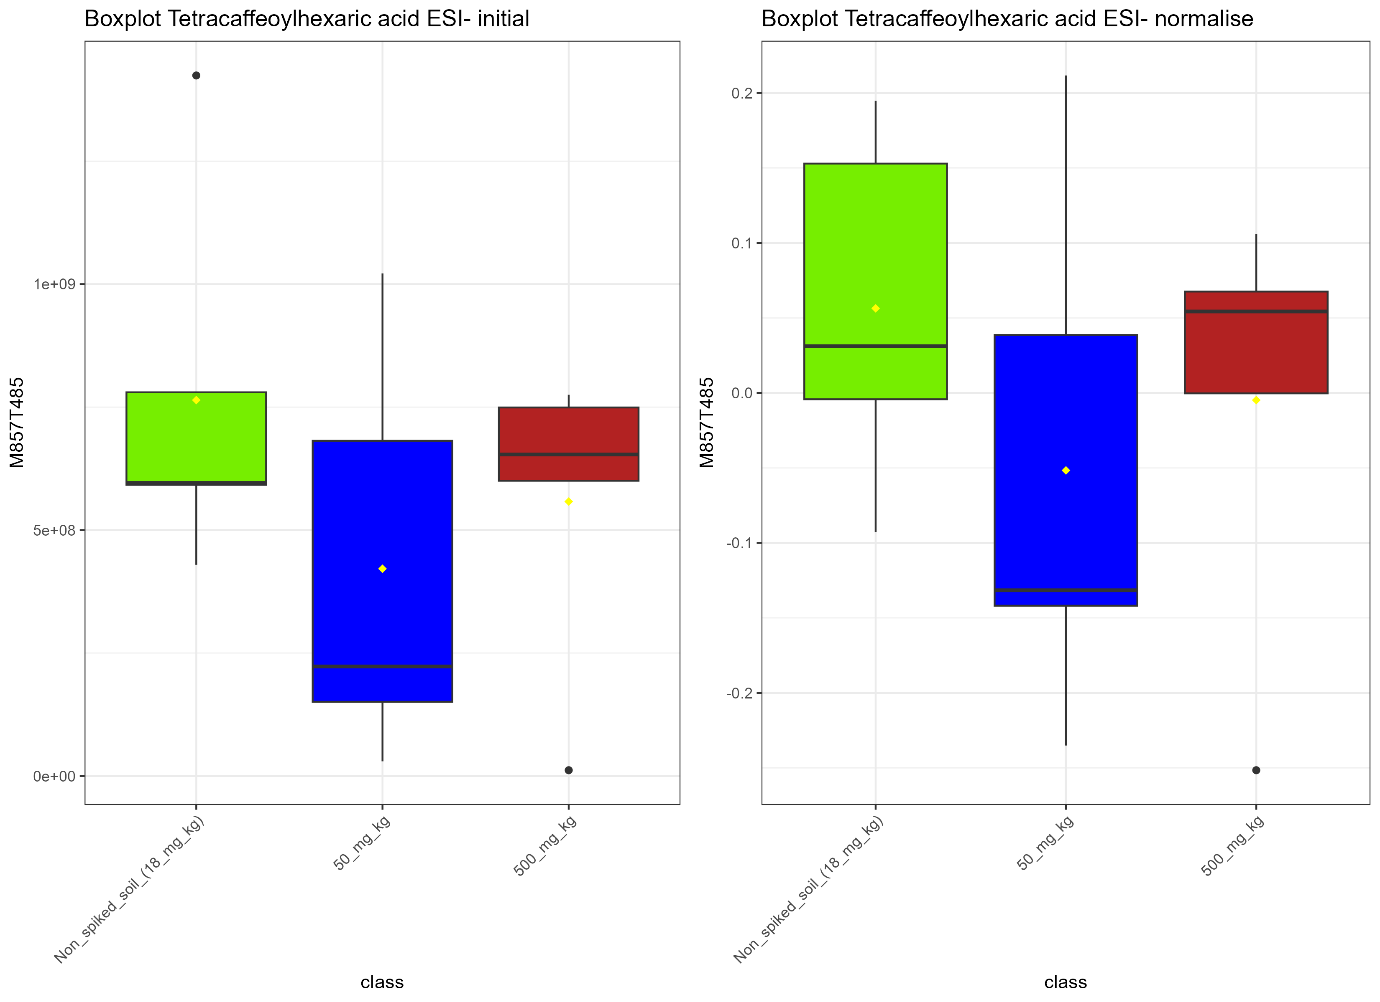


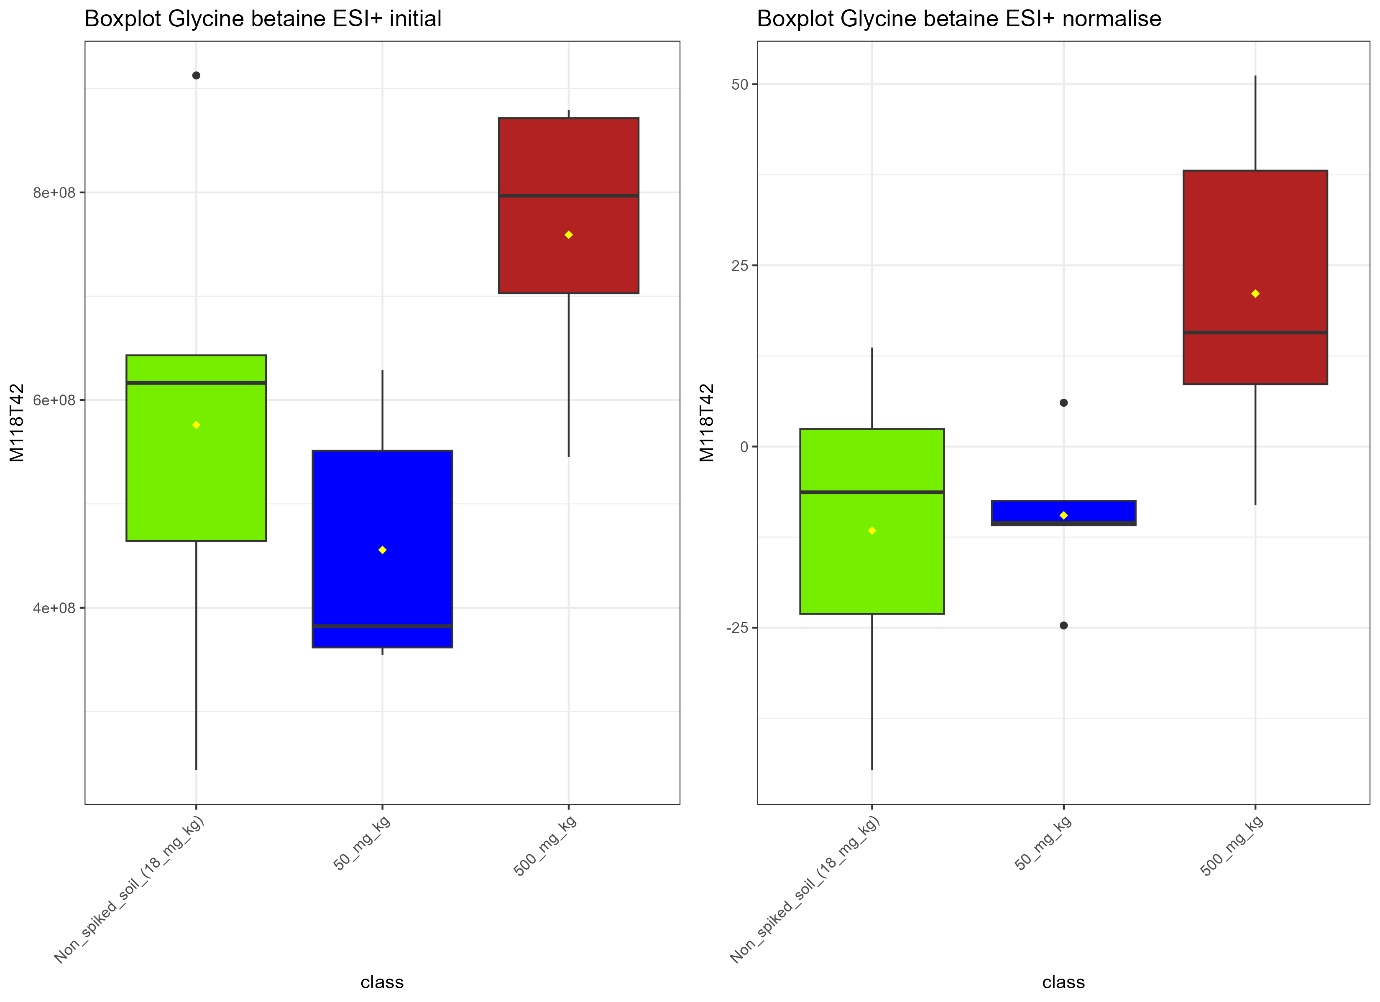


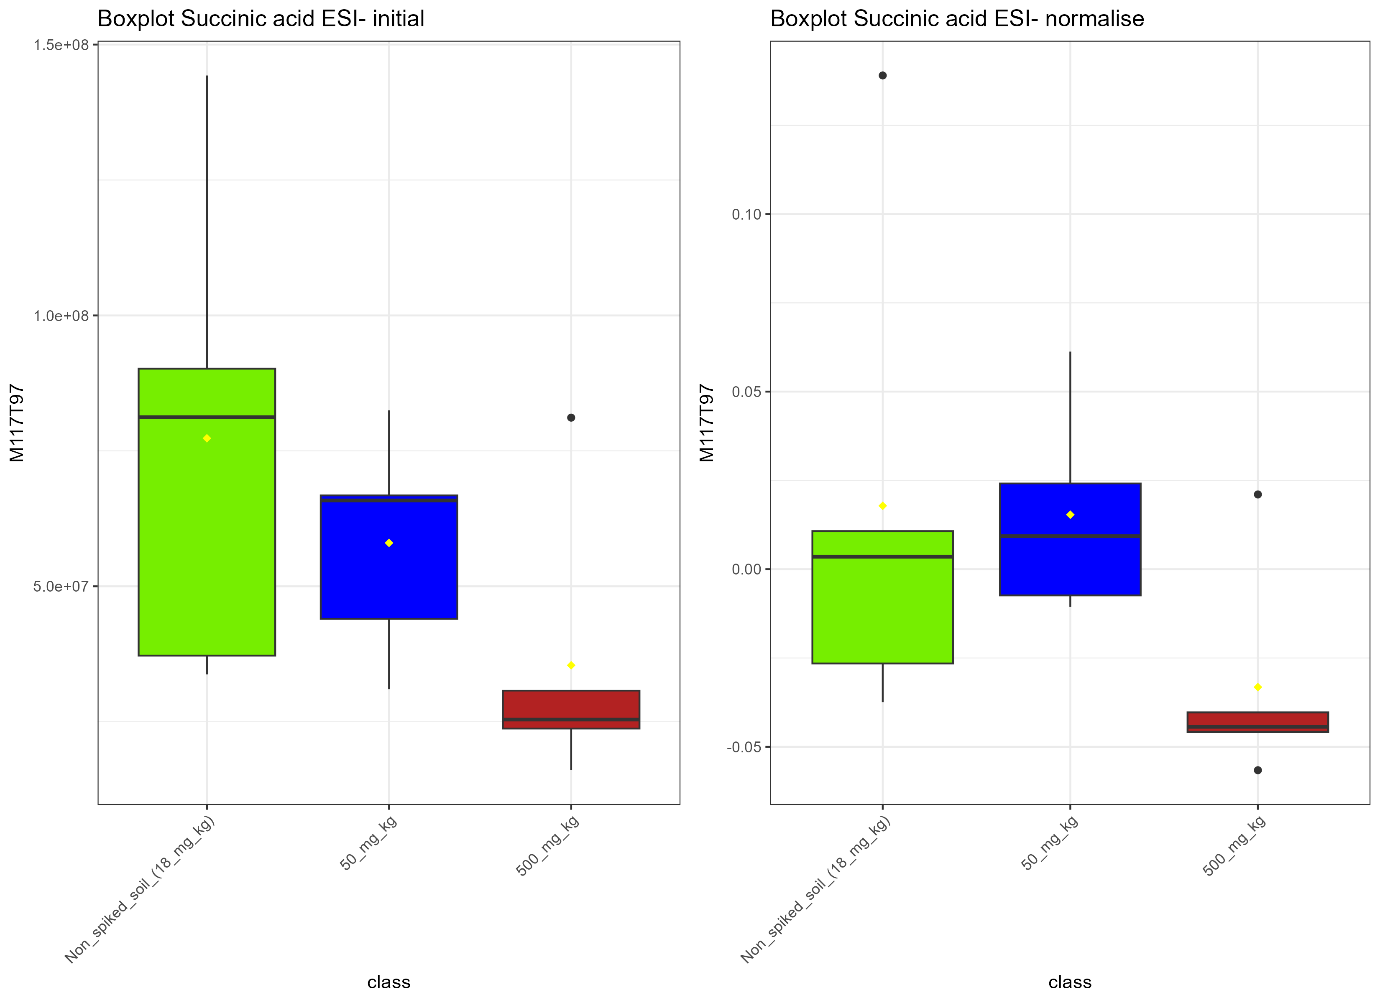

Supplement: Supplementary file 1 [file de8a12c98dde98fcdc789748.docx]
